# Supplementary material
Source: publisher site journal article supplement (https://www.dovepress.com/get_supplementary_file.php?f=489323.xlsx)
Supplement: Supplementary file 1 [file get_supplementary_file.php]

## Sheet: Active ingredients
Supplementary Table 1
	Active ingredients
Astragalus membranaceus（20）
HQ1	(3S,8S,9S,10R,13R,14S,17R)-10,13-dimethyl-17-[(2R,5S)-5-propan-2-yloctan-2-yl]-2,3,4,7,8,9,11,12,14,15,16,17-dodecahydro-1H-cyclopenta[a]phenanthren-3-ol
HQ2	Mairin
HQ3	Jaranol
HQ4	hederagenin
HQ5	isorhamnetin
HQ6	3,9-di-O-methylnissolin
HQ7	7-O-methylisomucronulatol
HQ8	9,10-dimethoxypterocarpan-3-O-β-D-glucoside
HQ9	(6aR,11aR)-9,10-dimethoxy-6a,11a-dihydro-6H-benzofurano[3,2-c]chromen-3-ol
HQ10	Bifendate
HQ11	formononetin
HQ12	Calycosin
HQ13	FA
HQ14	(3R)-3-(2-hydroxy-3,4-dimethoxyphenyl)chroman-7-ol
HQ15	isomucronulatol-7,2'-di-O-glucosiole
HQ16	1,7-Dihydroxy-3,9-dimethoxy pterocarpene
HQ17	5'-hydroxyiso-muronulatol-2',5'-di-O-glucoside
HQ18	isoflavanone
A	kaempferol
B	quercetin
Lonicera japonica （23）
JYH1	Mandenol
JYH2	Ethyl linolenate
JYH3	beta-carotene
JYH4	Eriodyctiol (flavanone)
JYH5	(-)-(3R,8S,9R,9aS,10aS)-9-ethenyl-8-(beta-D-glucopyranosyloxy)-2,3,9,9a,10,10a-hexahydro-5-oxo-5H,8H-pyrano[4,3-d]oxazolo[3,2-a]pyridine-3-carboxylic acid_qt
JYH6	secologanic dibutylacetal_qt
JYH7	ZINC03978781
JYH8	Chryseriol
JYH9	5-hydroxy-7-methoxy-2-(3,4,5-trimethoxyphenyl)chromone
JYH10	Centauroside_qt
JYH11	Ioniceracetalides B_qt
JYH12	dinethylsecologanoside
JYH13	phytofluene
JYH14	kryptoxanthin
JYH15	4,5'-Retro-.beta.,.beta.-Carotene-3,3'-dione, 4',5'-didehydro-
JYH16	7-epi-Vogeloside
JYH17	Caeruloside C
JYH18	XYLOSTOSIDINE
A	kaempferol
B	quercetin
C	beta-sitosterol
D	Stigmasterol
E	luteolin
Cyathula officinalis （4）
CNX1	Betavulgarin
CNX2	Rubrosterone
B	quercetin
C	beta-sitosterol
Polygonum cuspidatum （10）
HZ1	(+)-catechin
HZ2	Physciondiglucoside
HZ3	rhein
HZ4	Torachrysone-8-O-beta-D-(6'-oxayl)-glucoside
HZ5	6,8-Dihydroxy-7-methoxyxanthone
HZ6	Physovenine
HZ7	Picralinal
B	quercetin
C	beta-sitosterol
E	luteolin
Hedyotis diffusa （7）
BH1	Poriferasterol
BH2	(4aS,6aR,6aS,6bR,8aR,10R,12aR,14bS)-10-hydroxy-2,2,6a,6b,9,9,12a-heptamethyl-1,3,4,5,6,6a,7,8,8a,10,11,12,13,14b-tetradecahydropicene-4a-carboxylic acid
BH3	2-methoxy-3-methyl-9,10-anthraquinone
BH4	2,3-dimethoxy-6-methyanthraquinone
B	quercetin
C	beta-sitosterol
D	Stigmasterol
Polygala tenuifolia （5）
YZ1	24-Hydroxy-11-Deoxyglycyrrhetic Acid
YZ2	Dendramine
YZ3	6-Hydroxydendroxine
YZ4	Dendrine
YZ5	Dendrobine
Dendrobium nobile （6）
SH1	S-(2-Carboxyethyl)-L-Cysteine
SH2	Tenulin
SH3	Norharman
SH4	Perlolyrine
SH5	Harmine
SH6	Harman

## Sheet: Astragalus membranaceus
Supplementary Table 2a
Active ingredient	Target
HQ1	PGR
HQ1	AR
HQ1	HMGCR
HQ1	CYP51A1
HQ1	NPC1L1
HQ1	NR1H3
HQ1	RORC
HQ1	CYP17A1
HQ1	ESR2
HQ1	SREBF2
HQ1	ESR1
HQ1	SHBG
HQ1	CYP19A1
HQ1	RORA
HQ1	CYP2C19
HQ1	SLC6A2
HQ1	PTPN1
HQ1	SERPINA6
HQ1	SLC6A4
HQ1	BCHE
HQ1	NR1I3
HQ1	ACHE
HQ1	VDR
HQ1	CHRM2
HQ1	CDC25A
HQ1	G6PD
HQ1	NR1H2
HQ1	CES2
HQ1	GLRA1
HQ1	PTGER1
HQ1	PTGER2
HQ1	PPARA
HQ1	PPARD
HQ1	DHCR7
HQ1	SQLE
HQ1	HSD11B1
HQ1	PTPN6
HQ1	FDFT1
HQ1	PPARG
HQ1	NOS2
HQ1	UGT2B7
HQ1	POLB
HQ1	PREP
HQ2	PGR
HQ2	POLB
HQ2	AKR1B10
HQ2	SAE1
HQ2	UBA2
HQ2	HSD11B1
HQ2	PTPN1
HQ2	PTGES
HQ2	NR1H4
HQ2	PTPN2
HQ2	CDC25C
HQ2	GPBAR1
HQ2	TOP2A
HQ2	RORC
HQ2	PTPRF
HQ2	ACP1
HQ2	AR
HQ2	PLA2G1B
HQ2	CDC25B
HQ2	CDC25A
HQ2	CES2
HQ2	PDE4D
HQ2	FABP1
HQ2	VDR
HQ2	UGT2B7
HQ2	PPARG
HQ2	SCD
HQ2	SERPINA6
HQ2	SHBG
HQ2	G6PD
HQ2	CYP51A1
HQ2	ALOX5AP
HQ2	CYP19A1
HQ2	HSD17B3
HQ2	GABBR1
HQ2	PRKCH
HQ2	HSD11B2
HQ2	PTPN11
HQ2	TERT
HQ2	TOP1
HQ2	NPC1L1
HQ2	SIGMAR1
HQ2	CYP17A1
HQ2	GABRA2
HQ2	GABRB2
HQ2	GABRG2
HQ2	PTGS2
HQ2	MDM2
HQ2	TLR9
HQ2	FABP2
HQ2	CD81
HQ2	PTPN6
HQ2	PTGER2
HQ2	NR1H3
HQ3	SCN5A
HQ3	PTGS2
HQ3	PTGS1
HQ3	PRSS1
HQ3	NOS2
HQ3	NCOA2
HQ3	ESR2
HQ3	DPP4
HQ3	CHEK1
HQ3	CALM
HQ3	AR
HQ3	ADORA1
HQ3	ADORA3
HQ3	ABCG2
HQ3	MCL1
HQ3	AKR1B1
HQ3	NOX4
HQ3	PLG
HQ3	ADORA2A
HQ3	ALOX5
HQ3	ABCB1
HQ3	HSD17B1
HQ3	HSD17B2
HQ3	CYP1B1
HQ3	APP
HQ3	OPRD1
HQ3	OPRM1
HQ3	AURKB
HQ3	CA7
HQ3	CA12
HQ3	BACE1
HQ3	AHR
HQ3	FLT3
HQ3	SYK
HQ3	EGFR
HQ3	MMP13
HQ3	MMP9
HQ3	MMP3
HQ3	CDK1
HQ3	CA2
HQ3	CDK2
HQ3	GPR35
HQ3	PTPRS
HQ3	MPG
HQ3	SLC22A12
HQ3	CA6
HQ3	CA14
HQ3	CA9
HQ3	CA13
HQ3	CA5A
HQ3	CA4
HQ3	SRC
HQ3	ABCC1
HQ3	MMP2
HQ3	ESR1
HQ3	BCHE
HQ3	MET
HQ3	ALOX15
HQ3	PIM1
HQ3	XDH
HQ3	KDM4E
HQ3	TOP2A
HQ3	GLO1
HQ3	CA3
HQ3	CAMK2B
HQ3	NEK6
HQ3	APEX1
HQ3	NUAK1
HQ3	AKR1C1
HQ3	MAOA
HQ3	DAPK1
HQ3	CYP19A1
HQ3	KDR
HQ3	KIT
HQ3	PLK1
HQ3	IGF1R
HQ3	ACHE
HQ3	TERT
HQ3	ESRRA
HQ3	AKR1B10
HQ3	MYLK
HQ3	PIK3CG
HQ3	CSNK2A1
HQ3	ALK
HQ3	AXL
HQ3	CA1
HQ3	ODC1
HQ3	GSK3B
HQ3	CDK6
HQ3	ARG1
HQ3	TNKS2
HQ3	TNKS
HQ3	TYR
HQ3	TAS2R31
HQ3	AKT1
HQ3	CDK5R1
HQ3	CCNB3
HQ3	CDK5
HQ3	CCNB1
HQ3	CCNB2
HQ3	F2
HQ3	NAE1
HQ3	AMY1A
HQ3	PIK3R1
HQ3	PTK2
HQ3	DRD4
HQ3	AVPR2
HQ3	PTPN1
HQ3	PARP1
HQ3	MMP12
HQ4	SLC6A2
HQ4	SCN5A
HQ4	RXRA
HQ4	PTGS2
HQ4	PTGS1
HQ4	PGR
HQ4	PDE3A
HQ4	NCOA2
HQ4	GRIA2
HQ4	GABRA6
HQ4	GABRA5
HQ4	GABRA3
HQ4	GABRA2
HQ4	GABRA1
HQ4	CHRM3
HQ4	CHRM2
HQ4	CHRM1
HQ4	ADRA1B
HQ4	ADH1C
HQ5	XDH
HQ5	RELA
HQ5	PYGM
HQ5	PTPN1
HQ5	PTGS2
HQ5	PTGS1
HQ5	PRSS1
HQ5	PPARG
HQ5	PPARD
HQ5	PIM1
HQ5	PIK3CG
HQ5	OLR1
HQ5	NOS3
HQ5	NOS2
HQ5	NCOA2
HQ5	NCOA1
HQ5	NCF1
HQ5	MAPK14
HQ5	MAOB
HQ5	GSK3B
HQ5	GRIA2
HQ5	GABRA1
HQ5	F7
HQ5	ESR2
HQ5	ESR1
HQ5	DPP4
HQ5	CHEK1
HQ5	CCNA2
HQ5	CALM
HQ5	AR
HQ5	ACHE
HQ5	CA2
HQ5	CA7
HQ5	CA12
HQ5	CA4
HQ5	CYP1B1
HQ5	ABCC1
HQ5	NOX4
HQ5	AKR1B1
HQ5	ABCG2
HQ5	IGF1R
HQ5	EGFR
HQ5	ALOX15
HQ5	ALOX12
HQ5	AVPR2
HQ5	MAOA
HQ5	FLT3
HQ5	CYP19A1
HQ5	F2
HQ5	ALOX5
HQ5	AURKB
HQ5	DRD4
HQ5	ADORA1
HQ5	GLO1
HQ5	MPO
HQ5	PIK3R1
HQ5	ADORA2A
HQ5	DAPK1
HQ5	PYGL
HQ5	CA1
HQ5	SRC
HQ5	PTK2
HQ5	HSD17B2
HQ5	KDR
HQ5	MMP13
HQ5	MMP3
HQ5	CA3
HQ5	PLK1
HQ5	CA6
HQ5	CDK1
HQ5	MMP9
HQ5	MMP2
HQ5	PKN1
HQ5	CA14
HQ5	CA9
HQ5	CSNK2A1
HQ5	MET
HQ5	NEK2
HQ5	CXCR1
HQ5	CAMK2B
HQ5	ALK
HQ5	AKT1
HQ5	ABCB1
HQ5	NEK6
HQ5	PLA2G1B
HQ5	CA5A
HQ5	BACE1
HQ5	AXL
HQ5	NUAK1
HQ5	AKR1C2
HQ5	AKR1C1
HQ5	AKR1C3
HQ5	AKR1C4
HQ5	CA13
HQ5	AKR1A1
HQ5	GPR35
HQ5	MAPT
HQ5	KDM4E
HQ5	TOP2A
HQ5	INSR
HQ5	MYLK
HQ5	SYK
HQ5	APEX1
HQ5	CDK5R1
HQ5	CCNB3
HQ5	CDK6
HQ5	CDK2
HQ5	ARG1
HQ5	APP
HQ5	MCL1
HQ5	TERT
HQ5	TYR
HQ5	HSD17B1
HQ5	AHR
HQ5	ESRRA
HQ5	PTPRS
HQ5	PLG
HQ5	MPG
HQ5	SLC22A12
HQ5	PARP1
HQ5	TTR
HQ5	MMP12
HQ5	CD38
HQ5	AKR1B10
HQ5	TNKS2
HQ5	CDK5
HQ5	CCNB1
HQ5	CCNB2
HQ6	SCN5A
HQ6	RXRA
HQ6	PTGS2
HQ6	PTGS1
HQ6	PRSS1
HQ6	PDE3A
HQ6	OPRM1
HQ6	NOS3
HQ6	NOS2
HQ6	NCOA2
HQ6	HTR3A
HQ6	GABRA1
HQ6	ESR1
HQ6	CHRM3
HQ6	CHRM1
HQ6	CALM
HQ6	ADRB2
HQ6	ADRB1
HQ6	ADRA2C
HQ6	ADRA1D
HQ6	ADRA1B
HQ6	ACHE
HQ6	MET
HQ6	PTPN1
HQ6	SRC
HQ6	KDR
HQ6	ABCB1
HQ6	KIT
HQ6	PDE5A
HQ6	PDE2A
HQ6	PDE3B
HQ6	PDE10A
HQ6	PDGFRB
HQ6	PDGFRA
HQ6	PDE4C
HQ6	PRKCE
HQ6	PRKCH
HQ6	RPS6KA2
HQ6	CYP19A1
HQ6	ICAM1
HQ6	SELE
HQ6	MAPK8
HQ6	MAPK10
HQ6	MAPK9
HQ6	FGFR1
HQ6	LRRK2
HQ6	NPBWR1
HQ6	CNR1
HQ6	CNR2
HQ6	RET
HQ6	GSK3B
HQ6	NTRK1
HQ6	TUBB1
HQ6	CASP3
HQ6	ADORA2A
HQ6	CASP7
HQ6	CYP11B1
HQ6	CYP11B2
HQ6	SIRT1
HQ6	P2RX7
HQ6	ADORA2B
HQ6	SCN10A
HQ6	TNKS2
HQ6	TGFBR1
HQ6	JAK3
HQ6	PPP1CA
HQ6	JAK1
HQ6	JAK2
HQ6	TYK2
HQ6	PIK3CA
HQ6	SYK
HQ6	CMA1
HQ6	CCND3
HQ6	PRKCQ
HQ6	LIPG
HQ6	NAMPT
HQ6	PRKCA
HQ6	FPR1
HQ6	FPR2
HQ6	NR1H3
HQ6	PARP1
HQ6	NR1H2
HQ6	CA2
HQ6	CA1
HQ6	CA12
HQ6	CA9
HQ6	PLAT
HQ6	F2
HQ6	PGGT1B
HQ6	EPHX2
HQ6	PDE7A
HQ6	PIK3CD
HQ6	PIK3CB
HQ6	CLK1
HQ6	FLT3
HQ6	CDK9
HQ6	MAPK1
HQ6	PPIA
HQ6	CHEK1
HQ6	CDK2
HQ6	AURKA
HQ6	MDM2
HQ6	PIK3C2A
HQ6	CCNA2
HQ6	PRKDC
HQ6	BDKRB2
HQ6	PIK3CG
HQ6	TTK
HQ6	PIK3C2B
HQ6	BCL2A1
HQ6	MAP2K1
HQ6	BAZ2B
HQ6	CRHR1
HQ6	CSF1R
HQ6	LCK
HQ6	CDK7
HQ6	BAZ2A
HQ6	UTS2R
HQ6	CCNT1
HQ6	FNTA
HQ6	CCND1
HQ6	CDK4
HQ6	CCND2
HQ7	SLC6A4
HQ7	SLC6A3
HQ7	SCN5A
HQ7	RXRB
HQ7	RXRA
HQ7	PTGS2
HQ7	PTGS1
HQ7	PRSS1
HQ7	PPARG
HQ7	PIM1
HQ7	PDE3A
HQ7	OPRD1
HQ7	NOS3
HQ7	NOS2
HQ7	NCOA2
HQ7	MAPK14
HQ7	KCNH2
HQ7	HTR2A
HQ7	GSK3B
HQ7	GABRA1
HQ7	F10
HQ7	ESR2
HQ7	ESR1
HQ7	DRD1
HQ7	DPP4
HQ7	CHRM5
HQ7	CHRM4
HQ7	CHRM3
HQ7	CHRM2
HQ7	CHRM1
HQ7	CHEK1
HQ7	CCNA2
HQ7	CALM
HQ7	AR
HQ7	ADRB2
HQ7	ADRB1
HQ7	ADRA2C
HQ7	ADRA1D
HQ7	ADRA1B
HQ7	ADRA1A
HQ7	ALOX15
HQ7	ALOX12
HQ7	ALOX15B
HQ7	ABL1
HQ7	SYK
HQ7	CMA1
HQ7	CYP19A1
HQ7	F3
HQ7	MAOB
HQ7	ADAMTS5
HQ7	SIGMAR1
HQ7	PLA2G7
HQ7	HSD11B1
HQ7	AURKB
HQ7	MMP1
HQ7	ADAM17
HQ7	WEE1
HQ7	HSP90AA1
HQ7	MET
HQ7	TYMS
HQ7	RET
HQ7	NEK1
HQ7	TGFBR1
HQ7	KDR
HQ7	PDE10A
HQ7	KIT
HQ7	MMP7
HQ7	FLT4
HQ7	FLT3
HQ7	PDGFRA
HQ7	PIM2
HQ7	EGLN1
HQ7	NDUFA4
HQ7	FGFR1
HQ7	GUSB
HQ7	ALOX5
HQ7	ANPEP
HQ7	MMP16
HQ7	MMP8
HQ7	PPIA
HQ7	PTK2
HQ7	PLK1
HQ7	CA14
HQ7	QPCT
HQ7	DRD2
HQ7	MKNK1
HQ7	AURKA
HQ7	TAAR1
HQ7	GCGR
HQ7	JAK3
HQ7	LCK
HQ7	CLK4
HQ7	CLK1
HQ7	CLK2
HQ7	CLK3
HQ7	DYRK1B
HQ7	CDC25C
HQ7	CDC25A
HQ7	CDC25B
HQ7	LDHB
HQ7	ALPL
HQ7	NOX4
HQ7	IMPDH2
HQ7	ATP4B
HQ7	CDK2
HQ7	CDK4
HQ7	FASN
HQ7	HSD17B3
HQ7	RPS6KB1
HQ7	CDK1
HQ7	FYN
HQ7	RAF1
HQ7	EPHA2
HQ7	YES1
HQ7	BLK
HQ7	CSK
HQ7	EPHB2
HQ7	BMX
HQ7	LYN
HQ7	EPHA5
HQ7	EPHA4
HQ7	TXK
HQ7	FGR
HQ7	EPHA6
HQ7	PTK6
HQ7	PDF
HQ7	EPHB3
HQ7	EPHA3
HQ7	BTK
HQ7	TYRO3
HQ7	COQ8B
HQ7	EPHA1
HQ7	PLAA
HQ7	FKBP1A
HQ7	CHRNA7
HQ7	QPCTL
HQ7	ATP4A
HQ7	CCNB1
HQ8	TOP2
HQ8	PTGS2
HQ8	NCOA2
HQ9	SCN5A
HQ9	RXRA
HQ9	PTGS2
HQ9	PTGS1
HQ9	PRSS1
HQ9	NOS2
HQ9	NCOA2
HQ9	NCOA1
HQ9	HTR3A
HQ9	GABRA1
HQ9	ESR1
HQ9	CHRNA7
HQ9	CHRM4
HQ9	CHRM3
HQ9	CHRM1
HQ9	CALM
HQ9	ADRB2
HQ9	ADRA1D
HQ9	ADRA1B
HQ9	ACHE
HQ9	KDR
HQ9	PTPN1
HQ9	KIT
HQ9	MET
HQ9	RET
HQ9	ABCB1
HQ9	MAP2K1
HQ9	CDK2
HQ9	FGFR1
HQ9	PIM2
HQ9	SRC
HQ9	CYP19A1
HQ9	PARP1
HQ9	CCND3
HQ9	CHEK1
HQ9	WEE1
HQ9	COMT
HQ9	JAK3
HQ9	LCK
HQ9	MKNK1
HQ9	HSD17B3
HQ9	HTT
HQ9	VCP
HQ9	RPS6KA2
HQ9	ADORA2A
HQ9	MTOR
HQ9	PIK3CD
HQ9	PIK3CB
HQ9	PIK3CG
HQ9	PIK3CA
HQ9	AR
HQ9	GSK3B
HQ9	EZR
HQ9	MAPKAPK2
HQ9	AURKA
HQ9	CA2
HQ9	CA1
HQ9	CA12
HQ9	CA9
HQ9	ADAM17
HQ9	PIK3R1
HQ9	EPHB2
HQ9	ALOX15
HQ9	RAF1
HQ9	MIF
HQ9	ERN1
HQ9	CA4
HQ9	CA5B
HQ9	CA5A
HQ9	MMP8
HQ9	CA14
HQ9	BMP1
HQ9	MMP9
HQ9	MMP2
HQ9	PDE7A
HQ9	MMP7
HQ9	MMP25
HQ9	MMP16
HQ9	CDK4
HQ9	ADAM10
HQ9	ALPL
HQ9	SYK
HQ9	CA13
HQ9	LNPEP
HQ9	PDE4C
HQ9	CTSS
HQ9	NR4A1
HQ9	DBF4
HQ9	HSD17B2
HQ9	ALPG
HQ9	PLAA
HQ9	DNM1
HQ9	CASP3
HQ9	CASP7
HQ9	CCNB3
HQ9	HDAC3
HQ9	HDAC2
HQ9	NCOR2
HQ9	HDAC5
HQ9	HDAC7
HQ9	NCOR1
HQ9	HDAC11
HQ9	HDAC4
HQ9	HDAC9
HQ9	ESR2
HQ9	CDK5R1
HQ9	TUBB1
HQ9	ADORA2B
HQ9	MBD2
HQ9	CLK1
HQ9	CLK3
HQ9	DYRK2
HQ9	TUBB3
HQ9	ALOX12
HQ9	ANPEP
HQ9	GRM4
HQ9	ABL1
HQ9	CCNB1
HQ9	CCNB2
HQ9	CCND2
HQ9	CCND1
HQ9	CDC7
HQ9	CDK1
HQ9	CDK5
HQ10	TOP2
HQ10	PTGS2
HQ10	PTGS1
HQ10	MET
HQ10	KDR
HQ10	GSK3B
HQ10	SYK
HQ10	EGFR
HQ10	OXTR
HQ10	JAK3
HQ10	PTK2
HQ10	F2
HQ10	ABCG2
HQ10	AVPR2
HQ10	AVPR1A
HQ10	CMA1
HQ10	CTSG
HQ10	JUN
HQ11	SLC6A4
HQ11	SLC6A3
HQ11	SIRT1
HQ11	RXRA
HQ11	PTGS2
HQ11	PTGS1
HQ11	PRSS1
HQ11	PPARG
HQ11	PKIA
HQ11	PIM1
HQ11	PDE3A
HQ11	NOS3
HQ11	NOS2
HQ11	MT-ND6
HQ11	MAPK14
HQ11	MAOB
HQ11	JUN
HQ11	IL4
HQ11	HSD3B2
HQ11	HSD3B1
HQ11	GSK3B
HQ11	ESR2
HQ11	ESR1
HQ11	DPP4
HQ11	CHRM1
HQ11	CHEK1
HQ11	CCNA2
HQ11	CALM
HQ11	ATP5F1B
HQ11	AR
HQ11	ADRB2
HQ11	ADRA1A
HQ11	ACHE
HQ11	IL2
HQ11	CYP19A1
HQ11	ALDH2
HQ11	ESR1
HQ11	CA12
HQ11	ADORA1
HQ11	ADORA2A
HQ11	TBXAS1
HQ11	MAOA
HQ11	MGAM
HQ11	HTR2A
HQ11	HTR2C
HQ11	ESRRA
HQ11	ESRRB
HQ11	ABCG2
HQ11	CA7
HQ11	HSD17B2
HQ11	CA4
HQ11	CBR1
HQ11	SLC6A2
HQ11	ALOX12
HQ11	EGFR
HQ11	TYR
HQ11	XDH
HQ11	PFKFB3
HQ11	ESR2
HQ11	PTPRS
HQ11	HSD17B1
HQ11	ABCB1
HQ11	ALOX15
HQ11	MIF
HQ11	PPARA
HQ11	PTGS1
HQ11	TLR9
HQ11	MAOB
HQ11	CA2
HQ11	CA1
HQ11	NOX4
HQ11	PON1
HQ11	TNKS2
HQ11	TNKS
HQ11	ACHE
HQ11	CA3
HQ11	CA6
HQ11	CA14
HQ11	CA13
HQ11	CA5B
HQ11	CA5A
HQ11	DHODH
HQ11	STS
HQ11	ERCC5
HQ11	FEN1
HQ11	RAF1
HQ11	CA9
HQ11	PTPN1
HQ11	BACE1
HQ12	RXRA
HQ12	PTGS2
HQ12	PTGS1
HQ12	PRSS1
HQ12	PPARG
HQ12	PIM1
HQ12	PDE3A
HQ12	NOS2
HQ12	NCOA2
HQ12	MAPK14
HQ12	GSK3B
HQ12	ESR2
HQ12	ESR1
HQ12	DPP4
HQ12	CHEK1
HQ12	CCNA2
HQ12	CALM
HQ12	AR
HQ12	ADRB2
HQ12	CYP19A1
HQ12	CA7
HQ12	HSD17B2
HQ12	CA12
HQ12	CA4
HQ12	CBR1
HQ12	ABCB1
HQ12	TYR
HQ12	MIF
HQ12	PPARA
HQ12	HSD17B1
HQ12	ESR1
HQ12	ESR2
HQ12	TLR9
HQ12	PTPRS
HQ12	EGFR
HQ12	MAOB
HQ12	PTGS1
HQ12	SLC6A2
HQ12	ALOX12
HQ12	ALDH2
HQ12	XDH
HQ12	IL2
HQ12	TBXAS1
HQ12	MAOA
HQ12	MGAM
HQ12	HTR2A
HQ12	HTR2C
HQ12	ADORA1
HQ12	ADORA2A
HQ12	ESRRA
HQ12	ESRRB
HQ12	ABCG2
HQ12	CA2
HQ12	PFKFB3
HQ12	NOX4
HQ12	ALOX15
HQ12	CA1
HQ12	PTPN1
HQ12	PON1
HQ12	DUSP3
HQ12	CDC25B
HQ12	CDC7
HQ12	ACHE
HQ12	ABCC1
HQ12	CYP1B1
HQ12	PLAT
HQ12	F10
HQ12	PLAU
HQ12	STS
HQ12	CA5B
HQ12	HSP90AB1
HQ13	GSK3B
HQ13	TYMS
HQ13	DHFR
HQ13	SLC19A1
HQ13	SLC46A1
HQ13	FOLR1
HQ13	HDAC8
HQ13	FPGS
HQ13	FOLR2
HQ13	HDAC6
HQ13	HDAC1
HQ13	GART
HQ13	ATIC
HQ13	NOS2
HQ13	SLC5A1
HQ14	ALOX15
HQ14	ALOX12
HQ14	ALOX15B
HQ14	KDR
HQ14	RET
HQ14	PIK3R1
HQ14	CDK2
HQ14	EPHB2
HQ14	CHEK1
HQ14	WEE1
HQ14	HSP90AA1
HQ14	NR4A1
HQ14	GSK3B
HQ14	HTT
HQ14	HSP90AB1
HQ14	CYP19A1
HQ14	HSD17B3
HQ14	TYR
HQ14	DAO
HQ14	MET
HQ14	MAPKAPK2
HQ14	RPS6KA2
HQ14	PIM1
HQ14	PIM2
HQ14	FLT1
HQ14	EZR
HQ14	CTSS
HQ14	LCK
HQ14	HDAC3
HQ14	HDAC2
HQ14	NCOR2
HQ14	HDAC5
HQ14	HDAC7
HQ14	NCOR1
HQ14	HDAC11
HQ14	HDAC4
HQ14	HDAC9
HQ14	HDAC10
HQ14	RAF1
HQ14	ADORA2B
HQ14	VCP
HQ14	MMP8
HQ14	LNPEP
HQ14	MIF
HQ14	MMP1
HQ14	DNM1
HQ14	PIM3
HQ14	MMP25
HQ14	MMP16
HQ14	SYK
HQ14	PLK1
HQ14	ADAM17
HQ14	BMP1
HQ14	MMP7
HQ14	ADAM10
HQ14	SRC
HQ14	FLT3
HQ14	AURKB
HQ14	CSNK1G1
HQ14	RPS6KA1
HQ14	ROCK1
HQ14	BAD
HQ14	MAPK1
HQ14	CCND1
HQ14	CCNE2
HQ14	CCND3
HQ14	PDK1
HQ14	MKNK1
HQ14	MAOB
HQ14	ADORA2A
HQ14	MTOR
HQ14	PIK3CD
HQ14	PIK3CB
HQ14	PIK3CG
HQ14	PIK3CA
HQ14	PRF1
HQ14	EGFR
HQ14	ALK
HQ14	IMPDH1
HQ14	ABL1
HQ14	IMPDH2
HQ14	HSD17B2
HQ14	PRKCA
HQ14	CDK1
HQ14	CASP3
HQ14	SGK1
HQ14	CASP7
HQ14	TAAR1
HQ14	CCNB3
HQ14	PTGS1
HQ14	CDK5R1
HQ14	CLK1
HQ14	CLK3
HQ14	DYRK2
HQ14	AURKA
HQ14	SIGMAR1
HQ14	EP300
HQ14	FCER2
HQ14	PDE7A
HQ14	CDK4
HQ14	CCNB1
HQ14	CCNB2
HQ14	CCND2
HQ14	CCNE1
HQ14	CDK5
HQ15	TOP2
HQ16	RXRA
HQ16	PTGS2
HQ16	PRSS1
HQ16	PLA2G1B
A	XDH
A	VCAM1
A	TOP2
A	TNF
A	STAT1
A	SLPI
A	SLC6A2
A	SLC2A4
A	SELE
A	RELA
A	PTGS2
A	PTGS1
A	PSMD3
A	PRSS1
A	PPP3CA
A	PPARG
A	PIK3CG
A	PGR
A	NR1I3
A	NR1I2
A	NOS3
A	NOS2
A	NCOA2
A	MMP1
A	MAPK8
A	JUN
A	INSR
A	IKBKB
A	ICAM1
A	HMOX1
A	HAS2
A	GSTP1
A	GSTM2
A	GSTM1
A	GABRA2
A	GABRA1
A	F7
A	DPP4
A	DIO1
A	CYP3A4
A	CYP1B1
A	CYP1A2
A	CYP1A1
A	CHRM2
A	CHRM1
A	CASP3
A	CALM
A	BCL2
A	BAX
A	AR
A	ALOX5
A	AKT1
A	AKR1C3
A	AHSA1
A	AHR
A	ADRA1B
A	ACHE
A	NOX4
A	AKR1B1
A	XDH
A	TYR
A	FLT3
A	CA2
A	ALOX5
A	CA7
A	HSD17B2
A	ABCC1
A	HSD17B1
A	AHR
A	CA12
A	ESRRA
A	ABCB1
A	CYP1B1
A	ABCG2
A	ADORA1
A	CA4
A	ACHE
A	MAOA
A	GLO1
A	SYK
A	GSK3B
A	MMP9
A	MMP2
A	ALOX15
A	ALOX12
A	PTPRS
A	ADORA2A
A	CDK5R1
A	CCNB3
A	ARG1
A	GPR35
A	ESR2
A	DAPK1
A	MPG
A	SLC22A12
A	CDK6
A	CDK2
A	TTR
A	AKR1B10
A	TNKS2
A	TNKS
A	CYP19A1
A	CSNK2A1
A	EGFR
A	AVPR2
A	IGF1R
A	F2
A	PIM1
A	AURKB
A	DRD4
A	MPO
A	PIK3R1
A	PYGL
A	CA1
A	SRC
A	PTK2
A	KDR
A	MMP13
A	MMP3
A	CA3
A	PLK1
A	CA6
A	CDK1
A	PKN1
A	CA14
A	CA9
A	MET
A	NEK2
A	CXCR1
A	CAMK2B
A	ALK
A	AKT1
A	NEK6
A	PLA2G1B
A	CA5A
A	BACE1
A	AXL
A	NUAK1
A	AKR1C2
A	AKR1C1
A	AKR1C3
A	AKR1C4
A	CA13
A	AKR1A1
A	APP
A	PARP1
A	MMP12
A	CD38
A	TOP1
A	ESR1
A	PTGS2
A	CFTR
A	PFKFB3
A	AMY1A
A	GRK6
A	TERT
A	BCHE
A	CDK5
A	CCNB1
A	CCNB2
B	XDH
B	VEGFA
B	VCAM1
B	TP53
B	TOP2A
B	TOP2
B	TOP1
B	TNF
B	THBD
B	TGFB1
B	STAT1
B	SPP1
B	SOD1
B	SLC2A4
B	SERPINE1
B	SELE
B	SCN5A
B	RXRA
B	RUNX2
B	RUNX1T1
B	RELA
B	RB1
B	RASSF1
B	RASA1
B	RAF1
B	PTGS2
B	PTGS1
B	PTGER3
B	PTEN
B	PSMD3
B	PRSS1
B	PRKCB
B	PRKCA
B	PPARG
B	PPARD
B	PPARA
B	POR
B	PON1
B	PLAU
B	PLAT
B	PIK3CG
B	PCOLCE
B	PARP1
B	ODC1
B	NR1I3
B	NR1I2
B	NQO1
B	NPEPPS
B	NOS3
B	NKX3-1
B	NFKBIA
B	NFE2L2
B	NCOA2
B	NCF1
B	MYC
B	MPO
B	MMP9
B	MMP3
B	MMP2
B	MMP1
B	MGAM
B	MAPK1
B	MAOB
B	KCNH2
B	JUN
B	IRF1
B	INSR
B	IL6
B	IL2
B	IL1B
B	IL1A
B	IL10
B	IGFBP3
B	IGF2
B	IFNG
B	ICAM1
B	HSPB1
B	HSF1
B	HMOX1
B	HK2
B	HIF1A
B	HAS2
B	GSTP1
B	GSTM2
B	GSTM1
B	GJA1
B	GABRA1
B	FOS
B	F7
B	F3
B	F10
B	ERBB3
B	ERBB2
B	ELK1
B	EIF6
B	EGFR
B	EGF
B	E2F2
B	E2F1
B	DUOX2
B	DPP4
B	DIO1
B	DCAF5
B	CYP3A4
B	CYP1B1
B	CYP1A2
B	CYP1A1
B	CXCL8
B	CXCL2
B	CXCL11
B	CXCL10
B	CTSD
B	CRP
B	COL3A1
B	COL1A1
B	CLDN4
B	CHUK
B	CHEK2
B	CDKN1A
B	CD40LG
B	CCND1
B	CCNB1
B	CCL2
B	CAV1
B	CASP9
B	CASP8
B	CASP3
B	BIRC5
B	BCL2L1
B	BCL2
B	BAX
B	AR
B	ALOX5
B	AKT1
B	AHSA1
B	AHR
B	ADRB2
B	ACP3
B	ACHE
B	ACACA
B	NOX4
B	AVPR2
B	AKR1B1
B	MAOA
B	IGF1R
B	FLT3
B	CYP19A1
B	F2
B	CA2
B	PIM1
B	AURKB
B	DRD4
B	ADORA1
B	CA7
B	GLO1
B	PIK3R1
B	ADORA2A
B	DAPK1
B	PYGL
B	CA1
B	GSK3B
B	SRC
B	PTK2
B	HSD17B2
B	KDR
B	MMP13
B	CA3
B	ALOX15
B	ABCC1
B	PLK1
B	CA6
B	CDK1
B	CA12
B	PKN1
B	CA14
B	CA9
B	CSNK2A1
B	ALOX12
B	MET
B	CA4
B	NEK2
B	CXCR1
B	CAMK2B
B	ALK
B	ABCB1
B	NEK6
B	PLA2G1B
B	CA5A
B	BACE1
B	AXL
B	ABCG2
B	NUAK1
B	AKR1C2
B	AKR1C1
B	AKR1C3
B	AKR1C4
B	CA13
B	AKR1A1
B	GPR35
B	SYK
B	MAPT
B	KDM4E
B	MYLK
B	APEX1
B	CDK5R1
B	CCNB3
B	ARG1
B	PTPRS
B	ESR2
B	MPG
B	SLC22A12
B	CDK6
B	CDK2
B	TYR
B	HSD17B1
B	ESRRA
B	APP
B	TTR
B	MMP12
B	CD38
B	AKR1B10
B	TNKS2
B	TNKS
B	TERT
B	CDK5
B	CCNB2

## Sheet: Lonicera japonica
Supplementary Table 2b
Active ingredient	Target
JYH1	PTGS2
JYH1	PTGS1
JYH1	NCOA2
JYH1	FAAH
JYH1	CNR1
JYH1	CNR2
JYH1	CYP19A1
JYH1	CYP17A1
JYH1	CES2
JYH1	FABP4
JYH1	FABP3
JYH1	PTGES
JYH1	HSD11B1
JYH1	AR
JYH1	PTGS1
JYH1	PPARG
JYH1	PTGS2
JYH1	PTPN1
JYH1	C5AR1
JYH1	HSD17B2
JYH1	F2R
JYH1	PRKCQ
JYH1	NR3C1
JYH1	PGR
JYH1	TNKS
JYH1	LIMK2
JYH1	HMGCR
JYH1	PFKFB3
JYH1	AKR1C3
JYH1	FLT1
JYH1	PDGFRB
JYH1	KIT
JYH1	KDR
JYH1	FFAR1
JYH1	HRH4
JYH1	PPARA
JYH1	AKR1C2
JYH1	AKR1C1
JYH1	ALOX5AP
JYH1	CDC7
JYH1	NR1H3
JYH1	GABRB3
JYH1	GABRB3
JYH1	GABRB3
JYH1	GABRA2
JYH1	ACACB
JYH1	HRH3
JYH1	FABP5
JYH1	FABP1
JYH1	RARG
JYH1	RARB
JYH1	RARA
JYH1	RXRA
JYH1	RXRG
JYH1	NR3C2
JYH1	FNTA
JYH1	PRKCD
JYH1	PDE6D
JYH1	PPARD
JYH1	CDK1
JYH1	NPY2R
JYH1	GRIN2B
JYH1	MGAT2
JYH1	CTSK
JYH1	JAK1
JYH1	PRKCA
JYH1	SLC6A9
JYH1	GCK
JYH1	NPY5R
JYH1	ASAH1
JYH1	QPCT
JYH1	TACR1
JYH1	PTGIR
JYH1	ABL1
JYH1	MTNR1A
JYH1	MTNR1B
JYH1	KCNK3
JYH1	SRC
JYH1	ALOX5
JYH1	MAP3K5
JYH1	KCNQ3
JYH1	JAK2
JYH1	RBP4
JYH1	TBXA2R
JYH1	POLB
JYH1	PTAFR
JYH1	PDE10A
JYH1	HSD11B2
JYH1	CETP
JYH1	LIPE
JYH1	PARP2
JYH1	CYP2C19
JYH1	IMPDH2
JYH1	PSEN2
JYH1	SOAT1
JYH1	ITK
JYH1	AOC3
JYH1	SOAT2
JYH1	KIF11
JYH1	CASR
JYH1	GRM5
JYH1	ROCK1
JYH1	MAP3K8
JYH1	GABRA3
JYH1	GABRG2
JYH1	GABRG2
JYH1	GABRB3
JYH1	PSENEN
JYH1	NCSTN
JYH1	APH1A
JYH1	PSEN1
JYH1	APH1B
JYH1	FNTB
JYH1	KCNQ2
JYH1	GABRG2
JYH1	GABRA1
JYH1	GABRA5
JYH1	GABRG2
JYH2	PTGS1
JYH2	NCOA2
JYH2	FAAH
JYH2	CNR2
JYH2	CNR1
JYH2	CYP19A1
JYH2	CES2
JYH2	PTGES
JYH2	FABP4
JYH2	FABP3
JYH2	FFAR1
JYH2	CYP17A1
JYH2	AR
JYH2	PTGS2
JYH2	HSD11B1
JYH2	PPARG
JYH2	PPARA
JYH2	PTGS1
JYH2	PPARD
JYH2	TNKS
JYH2	PTPN1
JYH2	HSD11B2
JYH2	GRIN2B
JYH2	HMGCR
JYH2	FNTA
JYH2	ALOX5
JYH2	HSD17B2
JYH2	F2R
JYH2	SHBG
JYH2	AKR1C2
JYH2	AKR1C1
JYH2	GRM5
JYH2	ALOX5AP
JYH2	HRH3
JYH2	FABP5
JYH2	FABP1
JYH2	NR3C1
JYH2	PGR
JYH2	NR1H3
JYH2	PDE10A
JYH2	PSEN2
JYH2	SOAT1
JYH2	SOAT2
JYH2	AKR1C3
JYH2	TBXA2R
JYH2	PTAFR
JYH2	AVPR2
JYH2	IDH1
JYH2	F2RL3
JYH2	HRH4
JYH2	ADORA2A
JYH2	NPY5R
JYH2	PRKCA
JYH2	ELANE
JYH2	TGM2
JYH2	TGM1
JYH2	PLAU
JYH2	PFKFB3
JYH2	PLD1
JYH2	NR3C2
JYH2	INCENP
JYH2	AURKA
JYH2	GRM2
JYH2	TNKS2
JYH2	SLC6A9
JYH2	PYGM
JYH2	NLRP3
JYH2	GRM1
JYH2	PRKCD
JYH2	PRKCQ
JYH2	ABL1
JYH2	TERT
JYH2	VCP
JYH2	AKT1
JYH2	SMO
JYH2	FNTB
JYH2	AURKB
JYH2	PSENEN
JYH2	NCSTN
JYH2	APH1A
JYH2	PSEN1
JYH2	APH1B
JYH3	VEGFA
JYH3	PTGS2
JYH3	MYC
JYH3	MMP2
JYH3	MMP10
JYH3	MMP1
JYH3	JUN
JYH3	HMOX1
JYH3	GJA1
JYH3	F3
JYH3	CYP3A4
JYH3	CYP1A2
JYH3	CTNNB1
JYH3	CAV1
JYH3	CASP9
JYH3	CASP8
JYH3	CASP7
JYH3	CASP3
JYH3	BCL2
JYH3	ALB
JYH3	AKT1
JYH4	PYGM
JYH4	PTGS2
JYH4	PTGS1
JYH4	PIK3CG
JYH4	NCOA2
JYH4	CALM
JYH4	CA7
JYH4	CA12
JYH4	CA4
JYH4	CYP1B1
JYH4	CYP19A1
JYH4	PTGS1
JYH4	ABCC1
JYH4	HSD17B1
JYH4	SHBG
JYH4	CBR1
JYH4	ESR1
JYH4	ESR2
JYH4	TAS2R31
JYH4	ADORA1
JYH4	ADORA3
JYH4	MAOB
JYH4	ABCG2
JYH4	MMP13
JYH4	BACE1
JYH4	AKR1C3
JYH4	PLA2G1B
JYH4	KLK1
JYH4	KLK2
JYH4	MMP12
JYH4	GRM5
JYH4	APP
JYH4	CES1
JYH4	PPARG
JYH4	CES2
JYH4	MAPT
JYH4	CA2
JYH4	CA1
JYH4	SLC5A2
JYH4	POLB
JYH4	CDK5R1
JYH4	SRC
JYH4	PLA2G2A
JYH4	PLA2G5
JYH4	PLA2G10
JYH4	KIT
JYH4	KDR
JYH4	FGFR1
JYH4	MET
JYH4	EDNRA
JYH4	MMP2
JYH4	SNCA
JYH4	CA9
JYH4	CHRNA7
JYH4	ACHE
JYH4	DYRK1A
JYH4	MMP9
JYH4	CA6
JYH4	CA5A
JYH4	CA3
JYH4	CA13
JYH4	CA5B
JYH4	ABCB1
JYH4	KCNH2
JYH4	ST3GAL3
JYH4	FUT7
JYH4	FUT4
JYH4	RXRA
JYH4	LCK
JYH4	SYK
JYH4	IGFBP3
JYH4	AKR1B1
JYH4	NOX4
JYH4	GRM2
JYH4	BCL2
JYH4	FFAR1
JYH4	SERPINE1
JYH4	HIF1A
JYH4	CTSB
JYH4	NQO2
JYH4	TOP1
JYH4	ODC1
JYH4	AKT1
JYH4	HSD17B14
JYH4	PLG
JYH4	CLK1
JYH4	DYRK1B
JYH4	ATP4B
JYH4	IGF1R
JYH4	TYMP
JYH4	INSR
JYH4	CHEK1
JYH4	CDK5
JYH4	ATP4A
JYH5	PTGS2
JYH5	GABRA1
JYH5	DPP4
JYH5	CA2
JYH6	PTGS2
JYH6	ESR1
JYH7	PGR
JYH7	NR3C2
JYH7	NCOA2
JYH7	AR
JYH7	NPC1L1
JYH7	HMGCR
JYH7	CYP51A1
JYH7	CYP19A1
JYH7	NR1H3
JYH7	CYP17A1
JYH7	RORC
JYH7	ESR1
JYH7	ESR2
JYH7	SHBG
JYH7	SREBF2
JYH7	ACHE
JYH7	CYP2C19
JYH7	PTPN1
JYH7	SLC6A2
JYH7	BCHE
JYH7	RORA
JYH7	SERPINA6
JYH7	SLC6A4
JYH7	CHRM2
JYH7	G6PD
JYH7	VDR
JYH7	NR1H2
JYH7	HSD11B1
JYH7	PTGER1
JYH7	PTGER2
JYH7	CDC25A
JYH7	GLRA1
JYH7	CES2
JYH7	PTGES
JYH7	PPARA
JYH7	PPARD
JYH7	SQLE
JYH7	DHCR7
JYH7	NR1I3
JYH7	PTPN6
JYH7	NR3C1
JYH7	CDC25B
JYH7	NOS2
JYH7	HSD11B2
JYH7	TBXAS1
JYH7	PPARG
JYH7	UGT2B7
JYH7	POLB
JYH8	PTGS2
JYH8	PTGS1
JYH8	PRSS1
JYH8	PPARG
JYH8	PIK3CG
JYH8	NOS2
JYH8	NCOA2
JYH8	NCOA1
JYH8	MAPK14
JYH8	GSK3B
JYH8	ESR1
JYH8	DPP4
JYH8	CHEK1
JYH8	CALM
JYH8	AR
JYH8	ABCC1
JYH8	CYP1B1
JYH8	AKR1B1
JYH8	XDH
JYH8	CA2
JYH8	CA7
JYH8	CA12
JYH8	CA4
JYH8	CDK5R1
JYH8	CCNB3
JYH8	ARG1
JYH8	PTPRS
JYH8	ABCB1
JYH8	PLG
JYH8	APP
JYH8	ALOX5
JYH8	PARP1
JYH8	TNKS2
JYH8	TNKS
JYH8	NOX4
JYH8	FLT3
JYH8	ABCG2
JYH8	MAOA
JYH8	ADORA1
JYH8	GLO1
JYH8	SYK
JYH8	GSK3B
JYH8	TTR
JYH8	MMP9
JYH8	MMP2
JYH8	MMP12
JYH8	CD38
JYH8	AKR1B10
JYH8	TOP1
JYH8	ESR2
JYH8	ACHE
JYH8	CDK6
JYH8	PLA2G2A
JYH8	ADORA2A
JYH8	PIM1
JYH8	TERT
JYH8	HSD17B1
JYH8	ALOX15
JYH8	ALOX12
JYH8	ESR1
JYH8	CYP19A1
JYH8	CSNK2A1
JYH8	IGF1R
JYH8	EGFR
JYH8	OPRD1
JYH8	CDK2
JYH8	MCL1
JYH8	PTGS2
JYH8	CFTR
JYH8	HSD17B2
JYH8	CBR1
JYH8	CA1
JYH8	CA9
JYH8	F2
JYH8	CDK1
JYH8	AVPR2
JYH8	AURKB
JYH8	DRD4
JYH8	MPO
JYH8	PIK3R1
JYH8	DAPK1
JYH8	PYGL
JYH8	SRC
JYH8	PTK2
JYH8	KDR
JYH8	MMP13
JYH8	MMP3
JYH8	CA3
JYH8	PLK1
JYH8	CA6
JYH8	PKN1
JYH8	CA14
JYH8	MET
JYH8	NEK2
JYH8	CXCR1
JYH8	CAMK2B
JYH8	ALK
JYH8	AKT1
JYH8	NEK6
JYH8	PLA2G1B
JYH8	CA5A
JYH8	BACE1
JYH8	AXL
JYH8	NUAK1
JYH8	AKR1C2
JYH8	AKR1C1
JYH8	AKR1C3
JYH8	AKR1C4
JYH8	CA13
JYH8	AKR1A1
JYH8	GPR35
JYH8	AMY1A
JYH8	GRK6
JYH8	TYR
JYH8	AR
JYH8	CDK5
JYH8	CDK1
JYH8	CCNB1
JYH8	CCNB2
JYH8	AR
JYH9	TOP2
JYH9	SCN5A
JYH9	PTGS2
JYH9	PTGS1
JYH9	PRSS1
JYH9	PPARG
JYH9	NOS3
JYH9	NOS2
JYH9	NCOA2
JYH9	NCOA1
JYH9	MAPK14
JYH9	KCNH2
JYH9	GSK3B
JYH9	F10
JYH9	ESR2
JYH9	ESR1
JYH9	DPP4
JYH9	CHEK1
JYH9	CALM
JYH9	CACNA2D1
JYH9	BACE
JYH9	AR
JYH9	ADRB2
JYH9	AKR1B1
JYH9	ABCG2
JYH9	OPRD1
JYH9	APP
JYH9	CYP1B1
JYH9	ALOX5
JYH9	ABCC1
JYH9	NOX4
JYH9	SYK
JYH9	GLO1
JYH9	ARG1
JYH9	ADORA1
JYH9	ADORA2A
JYH9	PTPRS
JYH9	ADORA3
JYH9	MMP2
JYH9	PLG
JYH9	CA7
JYH9	CA12
JYH9	FLT3
JYH9	CCNB3
JYH9	MMP9
JYH9	XDH
JYH9	GSK3B
JYH9	HSD17B1
JYH9	AKR1B10
JYH9	ABCB1
JYH9	PARP1
JYH9	MMP12
JYH9	KIT
JYH9	PTGS2
JYH9	PIM1
JYH9	CA2
JYH9	CDK5R1
JYH9	CDK6
JYH9	EGFR
JYH9	AMY1A
JYH9	GRK6
JYH9	TTR
JYH9	HSD17B2
JYH9	MAOA
JYH9	CA4
JYH9	PLA2G2A
JYH9	TERT
JYH9	ST6GAL1
JYH9	CBR1
JYH9	TNKS2
JYH9	TNKS
JYH9	KDM4E
JYH9	GPR35
JYH9	TOP2A
JYH9	MPO
JYH9	CA3
JYH9	PKN1
JYH9	NEK2
JYH9	NEK6
JYH9	PLA2G1B
JYH9	APEX1
JYH9	NUAK1
JYH9	AKR1C2
JYH9	AKR1C1
JYH9	AKR1C4
JYH9	AKR1A1
JYH9	KDR
JYH9	BACE1
JYH9	TOP1
JYH9	CD38
JYH9	MMP13
JYH9	ESR2
JYH9	CA9
JYH9	OPRM1
JYH9	CA6
JYH9	CA14
JYH9	CA13
JYH9	CA5A
JYH9	ACHE
JYH9	MCL1
JYH9	SRC
JYH9	PIK3CG
JYH9	PLK1
JYH9	AURKB
JYH9	MMP3
JYH9	ALOX12
JYH9	MET
JYH9	PTK2
JYH9	NAE1
JYH9	BCHE
JYH9	TYR
JYH9	AHR
JYH9	ESRRA
JYH9	CDK2
JYH9	CSNK2A1
JYH9	MAOB
JYH9	LCK
JYH9	ALOX15
JYH9	CA1
JYH9	CDK1
JYH9	DRD4
JYH9	MYLK
JYH9	CYP19A1
JYH9	CDK1
JYH9	CCNB1
JYH9	CCNB2
JYH9	CDK5
JYH10	PRSS1
JYH10	NCOA2
JYH10	NCOA1
JYH10	ESR1
JYH10	DPP4
JYH10	CA2
JYH10	AR
JYH11	PTGS2
JYH11	NOS2
JYH11	GABRA1
JYH11	DPP4
JYH12	CA2
JYH12	AR
A	XDH
A	VCAM1
A	TOP2
A	TNF
A	STAT1
A	SLPI
A	SLC6A2
A	SLC2A4
A	SELE
A	RELA
A	PTGS2
A	PTGS1
A	PSMD3
A	PRSS1
A	PPP3CA
A	PPARG
A	PPARG
A	PIK3CG
A	PGR
A	NR1I3
A	NR1I2
A	NOS3
A	NOS2
A	NCOA2
A	MMP1
A	MAPK8
A	JUN
A	INSR
A	IKBKB
A	ICAM1
A	HMOX1
A	HAS2
A	GSTP1
A	GSTM2
A	GSTM1
A	GABRA2
A	GABRA1
A	F7
A	DPP4
A	DIO1
A	CYP3A4
A	CYP1B1
A	CYP1A2
A	CYP1A1
A	CHRM2
A	CHRM1
A	CASP3
A	CALM
A	BCL2
A	BAX
A	AR
A	ALOX5
A	AKT1
A	AKR1C3
A	AHSA1
A	AHR
A	ADRA1B
A	ACHE
A	NOX4
A	AKR1B1
A	XDH
A	TYR
A	FLT3
A	CA2
A	ALOX5
A	CA7
A	HSD17B2
A	ABCC1
A	HSD17B1
A	AHR
A	CA12
A	ESRRA
A	ABCB1
A	CYP1B1
A	ABCG2
A	ADORA1
A	CA4
A	ACHE
A	MAOA
A	GLO1
A	SYK
A	GSK3B
A	MMP9
A	MMP2
A	ALOX15
A	ALOX12
A	PTPRS
A	ADORA2A
A	CDK5R1
A	CCNB3
A	ARG1
A	GPR35
A	ESR2
A	DAPK1
A	MPG
A	SLC22A12
A	CDK6
A	CDK2
A	TTR
A	AKR1B10
A	TNKS2
A	TNKS
A	CYP19A1
A	CSNK2A1
A	EGFR
A	AVPR2
A	IGF1R
A	F2
A	PIM1
A	AURKB
A	DRD4
A	MPO
A	PIK3R1
A	PYGL
A	CA1
A	SRC
A	PTK2
A	KDR
A	MMP13
A	MMP3
A	CA3
A	PLK1
A	CA6
A	CDK1
A	PKN1
A	CA14
A	CA9
A	MET
A	NEK2
A	CXCR1
A	CAMK2B
A	ALK
A	AKT1
A	NEK6
A	PLA2G1B
A	CA5A
A	BACE1
A	AXL
A	NUAK1
A	AKR1C2
A	AKR1C1
A	AKR1C3
A	AKR1C4
A	CA13
A	AKR1A1
A	APP
A	PARP1
A	MMP12
A	CD38
A	TOP1
A	ESR1
A	PTGS2
A	CFTR
A	PFKFB3
A	AMY1A
A	GRK6
A	TERT
A	BCHE
A	CDK5
A	CDK1
A	CCNB1
A	CCNB2
A	TYMS
A	DHFR
A	SLC19A1
A	SLC46A1
A	FOLR1
A	HDAC8
A	FPGS
A	FOLR2
A	HDAC6
A	HDAC1
A	GART
A	ATIC
A	NOS2
A	SLC5A1
B	XDH
B	VEGFA
B	VCAM1
B	TP53
B	TOP2A
B	TOP2
B	TOP1
B	TNF
B	THBD
B	TGFB1
B	STAT1
B	SPP1
B	SOD1
B	SLC2A4
B	SERPINE1
B	SELE
B	SCN5A
B	RXRA
B	RUNX2
B	RUNX1T1
B	RELA
B	RB1
B	RASSF1
B	RASA1
B	RAF1
B	PTGS2
B	PTGS1
B	PTGER3
B	PTEN
B	PSMD3
B	PRSS1
B	PRKCB
B	PRKCA
B	PPARG
B	PPARG
B	PPARD
B	PPARA
B	POR
B	PON1
B	PLAU
B	PLAT
B	PIK3CG
B	PCOLCE
B	PARP1
B	ODC1
B	NR1I3
B	NR1I2
B	NQO1
B	NPEPPS
B	NOS3
B	NOS3
B	NKX3-1
B	NFKBIA
B	NFE2L2
B	NCOA2
B	NCF1
B	MYC
B	MPO
B	MMP9
B	MMP3
B	MMP2
B	MMP1
B	MGAM
B	MAPK1
B	MAOB
B	KCNH2
B	JUN
B	IRF1
B	INSR
B	IL6
B	IL2
B	IL1B
B	IL1A
B	IL10
B	IGFBP3
B	IGF2
B	IFNG
B	ICAM1
B	HSPB1
B	HSF1
B	HMOX1
B	HK2
B	HIF1A
B	HAS2
B	GSTP1
B	GSTM2
B	GSTM1
B	GJA1
B	GABRA1
B	FOS
B	F7
B	F3
B	F10
B	ERBB3
B	ERBB2
B	ELK1
B	EIF6
B	EGFR
B	EGF
B	E2F2
B	E2F1
B	DUOX2
B	DPP4
B	DIO1
B	DCAF5
B	CYP3A4
B	CYP1B1
B	CYP1A2
B	CYP1A1
B	CXCL8
B	CXCL2
B	CXCL11
B	CXCL10
B	CTSD
B	CRP
B	COL3A1
B	COL1A1
B	CLDN4
B	CHUK
B	CHEK2
B	CDKN1A
B	CD40LG
B	CCND1
B	CCNB1
B	CCL2
B	CAV1
B	CASP9
B	CASP8
B	CASP3
B	BIRC5
B	BCL2L1
B	BCL2
B	BAX
B	AR
B	ALOX5
B	AKT1
B	AHSA1
B	AHR
B	ADRB2
B	ACP3
B	ACHE
B	ACACA
B	NOX4
B	AKR1B1
B	CDK5R1
B	XDH
B	MAOA
B	FLT3
B	CA2
B	CCNB3
B	ALOX5
B	ADORA1
B	CA7
B	GLO1
B	APP
B	SYK
B	GSK3B
B	PARP1
B	TTR
B	MMP9
B	CA12
B	MMP2
B	CA4
B	MMP12
B	CD38
B	CYP1B1
B	ABCG2
B	AKR1B10
B	TNKS2
B	TNKS
B	TOP1
B	ARG1
B	PTPRS
B	ABCC1
B	HSD17B1
B	ACHE
B	CDK6
B	ABCB1
B	HSD17B2
B	ALOX15
B	ALOX12
B	ESR2
B	CYP19A1
B	ADORA2A
B	CSNK2A1
B	ESR1
B	PTGS2
B	CFTR
B	AMY1A
B	GRK6
B	CDK2
B	TERT
B	CA1
B	CA9
B	CDK1
B	TYR
B	AHR
B	ESRRA
B	GPR35
B	DAPK1
B	AVPR2
B	IGF1R
B	EGFR
B	F2
B	PIM1
B	AURKB
B	DRD4
B	MPO
B	PIK3R1
B	PYGL
B	SRC
B	PTK2
B	KDR
B	MMP13
B	MMP3
B	CA3
B	PLK1
B	CA6
B	PKN1
B	CA14
B	MET
B	NEK2
B	CXCR1
B	CAMK2B
B	ALK
B	AKT1
B	NEK6
B	PLA2G1B
B	CA5A
B	BACE1
B	AXL
B	NUAK1
B	AKR1C2
B	AKR1C1
B	AKR1C3
B	AKR1C4
B	CA13
B	AKR1A1
B	PFKFB3
B	KDM4E
B	PLG
B	AR
B	CDK5
B	CDK1
B	CCNB1
B	CCNB2
B	NOX4
B	AKR1B1
B	CDK5R1
B	XDH
B	MAOA
B	FLT3
B	CA2
B	CCNB3
B	ALOX5
B	ADORA1
B	CA7
B	GLO1
B	APP
B	SYK
B	GSK3B
B	PARP1
B	TTR
B	MMP9
B	CA12
B	MMP2
B	CA4
B	MMP12
B	CD38
B	CYP1B1
B	ABCG2
B	AKR1B10
B	TNKS2
B	TNKS
B	TOP1
B	ARG1
B	PTPRS
B	ABCC1
B	HSD17B1
B	ACHE
B	CDK6
B	ABCB1
B	HSD17B2
B	ALOX15
B	ALOX12
B	ESR2
B	CYP19A1
B	ADORA2A
B	CSNK2A1
B	ESR1
B	PTGS2
B	CFTR
B	AMY1A
B	GRK6
B	CDK2
B	TERT
B	CA1
B	CA9
B	CDK1
B	TYR
B	AHR
B	ESRRA
B	GPR35
B	DAPK1
B	AVPR2
B	IGF1R
B	EGFR
B	F2
B	PIM1
B	AURKB
B	DRD4
B	MPO
B	PIK3R1
B	PYGL
B	SRC
B	PTK2
B	KDR
B	MMP13
B	MMP3
B	CA3
B	PLK1
B	CA6
B	PKN1
B	CA14
B	MET
B	NEK2
B	CXCR1
B	CAMK2B
B	ALK
B	AKT1
B	NEK6
B	PLA2G1B
B	CA5A
B	BACE1
B	AXL
B	NUAK1
B	AKR1C2
B	AKR1C1
B	AKR1C3
B	AKR1C4
B	CA13
B	AKR1A1
B	PFKFB3
B	KDM4E
B	PLG
B	AR
B	CDK5
B	CDK1
B	CCNB1
B	CCNB2
B	TYMS
B	DHFR
B	SLC19A1
B	SLC46A1
B	FOLR1
B	HDAC8
B	FPGS
B	FOLR2
B	HDAC6
B	HDAC1
B	GART
B	ATIC
B	NOS2
B	SLC5A1
C	TGFB1
C	SLC6A4
C	SCN5A
C	PTGS2
C	PTGS1
C	PRKCA
C	PON1
C	PIK3CG
C	PGR
C	PDE3A
C	OPRM1
C	NCOA2
C	MAP2
C	KCNH2
C	JUN
C	HTR2A
C	GABRA5
C	GABRA3
C	GABRA2
C	GABRA1
C	DRD1
C	CHRNA7
C	CHRNA2
C	CHRM4
C	CHRM3
C	CHRM2
C	CHRM1
C	CASP9
C	CASP8
C	CASP3
C	BCL2
C	BAX
C	ADRB2
C	ADRA1B
C	ADRA1A
C	AR
C	HMGCR
C	CYP51A1
C	NPC1L1
C	NR1H3
C	CYP19A1
C	CYP17A1
C	RORC
C	ESR1
C	ESR2
C	SREBF2
C	SHBG
C	SLC6A2
C	CYP2C19
C	RORA
C	PTPN1
C	BCHE
C	SERPINA6
C	SLC6A4
C	CHRM2
C	VDR
C	ACHE
C	G6PD
C	NR1H2
C	GLRA1
C	CES2
C	PTGER1
C	PTGER2
C	HSD11B1
C	PTGES
C	CDC25A
C	PPARA
C	PPARD
C	DHCR7
C	SQLE
C	PTPN6
C	NR1I3
C	FDFT1
C	SIGMAR1
C	NOS2
C	NR3C1
C	PPARG
C	CDC25B
C	UGT2B7
C	HSD11B2
C	POLB
C	AR
C	HMGCR
C	CYP51A1
C	NPC1L1
C	NR1H3
C	CYP19A1
C	CYP17A1
C	RORC
C	ESR1
C	ESR2
C	SREBF2
C	SHBG
C	SLC6A2
C	CYP2C19
C	RORA
C	PTPN1
C	BCHE
C	SERPINA6
C	SLC6A4
C	CHRM2
C	VDR
C	ACHE
C	G6PD
C	NR1H2
C	GLRA1
C	CES2
C	PTGER1
C	PTGER2
C	HSD11B1
C	PTGES
C	CDC25A
C	PPARA
C	PPARD
C	DHCR7
C	SQLE
C	PTPN6
C	NR1I3
C	FDFT1
C	SIGMAR1
C	NOS2
C	NR3C1
C	PPARG
C	CDC25B
C	UGT2B7
C	HSD11B2
C	POLB
D	SLC6A3
D	SLC6A2
D	SCN5A
D	RXRA
D	PTGS2
D	PTGS1
D	PLAU
D	PGR
D	NR3C2
D	NCOA2
D	NCOA1
D	MAOB
D	MAOA
D	LTA4H
D	HTR2A
D	GABRA3
D	GABRA1
D	CTRB1
D	CHRNA7
D	CHRM3
D	CHRM2
D	CHRM1
D	ADRB2
D	ADRB1
D	ADRA2A
D	ADRA1B
D	ADRA1A
D	ADH1C
D	AR
D	NPC1L1
D	HMGCR
D	CYP51A1
D	CYP19A1
D	NR1H3
D	CYP17A1
D	RORC
D	ESR1
D	ESR2
D	SHBG
D	SREBF2
D	ACHE
D	CYP2C19
D	PTPN1
D	SLC6A2
D	BCHE
D	RORA
D	SERPINA6
D	SLC6A4
D	CHRM2
D	G6PD
D	VDR
D	NR1H2
D	HSD11B1
D	PTGER1
D	PTGER2
D	CDC25A
D	GLRA1
D	CES2
D	PTGES
D	PPARA
D	PPARD
D	SQLE
D	DHCR7
D	NR1I3
D	PTPN6
D	NR3C1
D	CDC25B
D	NOS2
D	HSD11B2
D	TBXAS1
D	PPARG
D	UGT2B7
D	POLB
E	XDH
E	VEGFA
E	TYR
E	TP53
E	TOP2A
E	TOP1
E	TNF
E	SLC2A4
E	RELA
E	RB1
E	PTGS2
E	PTGS1
E	PTGES
E	PRSS1
E	PPARG
E	PIK3CG
E	PCNA
E	NUF2
E	NFKBIA
E	NCOA2
E	MMP9
E	MMP2
E	MMP1
E	MET
E	MDM2
E	MCL1
E	MAPK1
E	JUN
E	INSR
E	IL6
E	IL4
E	IL2
E	IL10
E	IFNG
E	ICAM1
E	HMOX1
E	GSTP1
E	ERBB2
E	EGFR
E	DPP4
E	CDKN1A
E	CD40LG
E	CCND1
E	CCNB1
E	CASP9
E	CASP7
E	CASP3
E	BIRC5
E	BCL2L1
E	AR
E	APP
E	AKT1
E	ADCY2
E	NOX4
E	AVPR2
E	AKR1B1
E	XDH
E	MAOA
E	IGF1R
E	FLT3
E	CYP19A1
E	EGFR
E	F2
E	CA2
E	PIM1
E	ALOX5
E	AURKB
E	DRD4
E	ADORA1
E	CA7
E	GLO1
E	MPO
E	PIK3R1
E	ADORA2A
E	DAPK1
E	PYGL
E	CA1
E	GSK3B
E	SRC
E	PTK2
E	HSD17B2
E	KDR
E	MMP13
E	MMP3
E	CA3
E	ALOX15
E	ABCC1
E	PLK1
E	CA6
E	CDK1
E	MMP9
E	CA12
E	MMP2
E	PKN1
E	CA14
E	CA9
E	CSNK2A1
E	ALOX12
E	MET
E	CA4
E	NEK2
E	CXCR1
E	CAMK2B
E	ALK
E	AKT1
E	ABCB1
E	NEK6
E	PLA2G1B
E	CA5A
E	BACE1
E	CYP1B1
E	AXL
E	ABCG2
E	NUAK1
E	AKR1C2
E	AKR1C1
E	AKR1C3
E	AKR1C4
E	CA13
E	AKR1A1
E	GPR35
E	SYK
E	MAPT
E	KDM4E
E	TOP2A
E	INSR
E	ACHE
E	MYLK
E	PIK3CG
E	APEX1
E	CDK5R1
E	CCNB3
E	ARG1
E	PTPRS
E	ESR2
E	MPG
E	SLC22A12
E	CDK6
E	CDK2
E	TYR
E	HSD17B1
E	AHR
E	ESRRA
E	APP
E	PARP1
E	TTR
E	MMP12
E	CD38
E	AKR1B10
E	TNKS2
E	TNKS
E	TOP1
E	TERT
E	CDK5
E	CDK1
E	CCNB1
E	CCNB2

## Sheet: Cyathula officinalis
Supplementary Table 2c
Active ingredient	Target
CNX1	SCN5A
CNX1	RXRA
CNX1	PTGS2
CNX1	PTGS1
CNX1	PRSS1
CNX1	PPARG
CNX1	PIK3CG
CNX1	NOS2
CNX1	MAPK14
CNX1	KCNH2
CNX1	GSK3B
CNX1	F7
CNX1	ESR2
CNX1	ESR1
CNX1	DPP4
CNX1	CHEK1
CNX1	CALM
CNX1	CA2
CNX1	AR
CNX1	EGFR
CNX1	PPARA
CNX1	CA7
CNX1	CA12
CNX1	ALDH2
CNX1	RET
CNX1	CYP19A1
CNX1	MAOA
CNX1	HSD17B2
CNX1	CBR1
CNX1	RPS6KA3
CNX1	ABCB1
CNX1	PCSK7
CNX1	CYP2C9
CNX1	NQO1
CNX1	MAPK1
CNX1	ADORA2B
CNX1	DHFR
CNX1	GUSB
CNX1	ADORA1
CNX1	IL2
CNX1	CA2
CNX1	ABL1
CNX1	MTOR
CNX1	PIK3CD
CNX1	PRKDC
CNX1	PIK3CB
CNX1	HCK
CNX1	PIK3CA
CNX1	EPHB4
CNX1	BRAF
CNX1	PPIA
CNX1	JAK3
CNX1	JAK1
CNX1	JAK2
CNX1	TYK2
CNX1	PLA2G7
CNX1	DYRK1A
CNX1	DYRK1B
CNX1	AKR1B1
CNX1	KCNMA1
CNX1	ELANE
CNX1	ASF1A
CNX1	CDK1
CNX1	CCNE1
CNX1	DBF4
CNX1	CHRNA7
CNX1	ADAM17
CNX1	CA4
CNX1	STAT3
CNX1	FLT1
CNX1	PDGFRB
CNX1	FLT4
CNX1	PDGFRA
CNX1	ROCK1
CNX1	MMP1
CNX1	ABCG2
CNX1	MAPKAPK2
CNX1	CSNK1G1
CNX1	RPS6KA1
CNX1	BCAT2
CNX1	KCNA3
CNX1	HDAC2
CNX1	HDAC8
CNX1	ALPL
CNX1	ADORA2A
CNX1	MAOB
CNX1	CXCR2
CNX1	CTSL
CNX1	CAPN1
CNX1	CTSB
CNX1	PTPRS
CNX1	ERBB2
CNX1	TNNC1
CNX1	KDM1A
CNX1	HSD17B1
CNX1	PDE4B
CNX1	ILK
CNX1	MAPK8
CNX1	MAPK10
CNX1	MAPK9
CNX1	SLC9A1
CNX1	PLAU
CNX1	FGFR1
CNX1	ALOX5
CNX1	F12
CNX1	CCNB1
CNX1	CDK2
CNX1	CDC7
CNX1	TNNT2
CNX1	TNNI3
CNX2	NR3C2
B	XDH
B	VEGFA
B	VCAM1
B	TP53
B	TOP2A
B	TOP2
B	TOP1
B	TNF
B	THBD
B	TGFB1
B	STAT1
B	SPP1
B	SOD1
B	SLC2A4
B	SERPINE1
B	SELE
B	SCN5A
B	RXRA
B	RUNX2
B	RUNX1T1
B	RELA
B	RB1
B	RASSF1
B	RASA1
B	RAF1
B	PTGS2
B	PTGS1
B	PTGER3
B	PTEN
B	PSMD3
B	PRSS1
B	PRKCB
B	PRKCA
B	PPARG
B	PPARG
B	PPARD
B	PPARA
B	POR
B	PON1
B	PLAU
B	PLAT
B	PIK3CG
B	PCOLCE
B	PARP1
B	ODC1
B	NR1I3
B	NR1I2
B	NQO1
B	NPEPPS
B	NOS3
B	NOS3
B	NKX3-1
B	NFKBIA
B	NFE2L2
B	NCOA2
B	NCF1
B	MYC
B	MPO
B	MMP9
B	MMP3
B	MMP2
B	MMP1
B	MGAM
B	MAPK1
B	MAOB
B	KCNH2
B	JUN
B	IRF1
B	INSR
B	IL6
B	IL2
B	IL1B
B	IL1A
B	IL10
B	IGFBP3
B	IGF2
B	IFNG
B	ICAM1
B	HSPB1
B	HSF1
B	HMOX1
B	HK2
B	HIF1A
B	HAS2
B	GSTP1
B	GSTM2
B	GSTM1
B	GJA1
B	GABRA1
B	FOS
B	F7
B	F3
B	F10
B	ERBB3
B	ERBB2
B	ELK1
B	EIF6
B	EGFR
B	EGF
B	E2F2
B	E2F1
B	DUOX2
B	DPP4
B	DIO1
B	DCAF5
B	CYP3A4
B	CYP1B1
B	CYP1A2
B	CYP1A1
B	CXCL8
B	CXCL2
B	CXCL11
B	CXCL10
B	CTSD
B	CRP
B	COL3A1
B	COL1A1
B	CLDN4
B	CHUK
B	CHEK2
B	CDKN1A
B	CD40LG
B	CCND1
B	CCNB1
B	CCL2
B	CAV1
B	CASP9
B	CASP8
B	CASP3
B	BIRC5
B	BCL2L1
B	BCL2
B	BAX
B	AR
B	ALOX5
B	AKT1
B	AHSA1
B	AHR
B	ADRB2
B	ACP3
B	ACHE
B	ACACA
B	NOX4
B	AKR1B1
B	CDK5R1
B	XDH
B	MAOA
B	FLT3
B	CA2
B	CCNB3
B	ALOX5
B	ADORA1
B	CA7
B	GLO1
B	APP
B	SYK
B	GSK3B
B	PARP1
B	TTR
B	MMP9
B	CA12
B	MMP2
B	CA4
B	MMP12
B	CD38
B	CYP1B1
B	ABCG2
B	AKR1B10
B	TNKS2
B	TNKS
B	TOP1
B	ARG1
B	PTPRS
B	ABCC1
B	HSD17B1
B	ACHE
B	CDK6
B	ABCB1
B	HSD17B2
B	ALOX15
B	ALOX12
B	ESR2
B	CYP19A1
B	ADORA2A
B	CSNK2A1
B	ESR1
B	PTGS2
B	CFTR
B	AMY1A
B	GRK6
B	CDK2
B	TERT
B	CA1
B	CA9
B	CDK1
B	TYR
B	AHR
B	ESRRA
B	GPR35
B	DAPK1
B	AVPR2
B	IGF1R
B	EGFR
B	F2
B	PIM1
B	AURKB
B	DRD4
B	MPO
B	PIK3R1
B	PYGL
B	SRC
B	PTK2
B	KDR
B	MMP13
B	MMP3
B	CA3
B	PLK1
B	CA6
B	PKN1
B	CA14
B	MET
B	NEK2
B	CXCR1
B	CAMK2B
B	ALK
B	AKT1
B	NEK6
B	PLA2G1B
B	CA5A
B	BACE1
B	AXL
B	NUAK1
B	AKR1C2
B	AKR1C1
B	AKR1C3
B	AKR1C4
B	CA13
B	AKR1A1
B	PFKFB3
B	KDM4E
B	PLG
B	AR
B	CDK5
B	CDK1
B	CCNB1
B	CCNB2
B	TYMS
B	DHFR
B	SLC19A1
B	SLC46A1
B	FOLR1
B	HDAC8
B	FPGS
B	FOLR2
B	HDAC6
B	HDAC1
B	GART
B	ATIC
B	NOS2
B	SLC5A1
C	TGFB1
C	SLC6A4
C	SCN5A
C	PTGS2
C	PTGS1
C	PRKCA
C	PON1
C	PIK3CG
C	PGR
C	PDE3A
C	OPRM1
C	NCOA2
C	MAP2
C	KCNH2
C	JUN
C	HTR2A
C	GABRA5
C	GABRA3
C	GABRA2
C	GABRA1
C	DRD1
C	CHRNA7
C	CHRNA2
C	CHRM4
C	CHRM3
C	CHRM2
C	CHRM1
C	CASP9
C	CASP8
C	CASP3
C	BCL2
C	BAX
C	ADRB2
C	ADRA1B
C	ADRA1A
C	AR
C	HMGCR
C	CYP51A1
C	NPC1L1
C	NR1H3
C	CYP19A1
C	CYP17A1
C	RORC
C	ESR1
C	ESR2
C	SREBF2
C	SHBG
C	SLC6A2
C	CYP2C19
C	RORA
C	PTPN1
C	BCHE
C	SERPINA6
C	SLC6A4
C	CHRM2
C	VDR
C	ACHE
C	G6PD
C	NR1H2
C	GLRA1
C	CES2
C	PTGER1
C	PTGER2
C	HSD11B1
C	PTGES
C	CDC25A
C	PPARA
C	PPARD
C	DHCR7
C	SQLE
C	PTPN6
C	NR1I3
C	FDFT1
C	SIGMAR1
C	NOS2
C	NR3C1
C	PPARG
C	CDC25B
C	UGT2B7
C	HSD11B2
C	POLB

## Sheet: Polygonum cuspidatum
Supplementary Table 2d
Active ingredient	Target
HZ1	RXRA
HZ1	PTGS2
HZ1	PTGS1
HZ1	NCOA2
HZ1	HAS2
HZ1	ESR1
HZ1	CAT
HZ1	CALM
HZ1	ESR1
HZ2	TOP2
HZ2	ESR1
HZ3	PTGS2
HZ3	PTGS1
HZ3	PIK3CG
HZ3	NCOA2
HZ3	JUN
HZ3	FTO
HZ3	CYP19A1
HZ3	ELANE
HZ3	FNTA
HZ3	PTP4A3
HZ3	CSNK2A1
HZ3	ESR2
HZ3	PIM1
HZ3	CASP3
HZ3	LDHA
HZ3	LDHB
HZ3	ERN1
HZ3	ESR1
HZ3	CDC25B
HZ3	BCL2
HZ3	MCL1
HZ3	AMPD3
HZ3	ECE1
HZ3	LIMK1
HZ3	F2
HZ3	SLC13A5
HZ3	LCK
HZ3	IGFBP3
HZ3	GRK6
HZ3	EGLN1
HZ3	MME
HZ3	CDK2
HZ3	HNF4A
HZ3	MAPK8
HZ3	OGA
HZ3	GPR35
HZ3	ADA
HZ3	ACLY
HZ3	CASP6
HZ3	CASP7
HZ3	CASP8
HZ3	CASP1
HZ3	CASP2
HZ3	NOX4
HZ3	CAMKK2
HZ3	ERBB2
HZ3	SLC6A3
HZ3	EGFR
HZ3	FNTB
HZ4	TOP2
HZ5	PTGS2
HZ5	PTGS1
HZ5	PKIA
HZ5	PIK3CG
HZ5	MAPK14
HZ5	GSK3B
HZ5	DPP4
HZ5	CHEK1
HZ5	CA2
HZ5	ADRB2
HZ5	MAOA
HZ5	PTGS2
HZ5	CDK5R1
HZ5	CA7
HZ5	CA12
HZ5	CA9
HZ5	CA1
HZ5	KDR
HZ5	AXL
HZ5	CBR1
HZ5	ALOX5
HZ5	CA13
HZ5	TYMS
HZ5	MET
HZ5	PIM1
HZ5	CISD1
HZ5	DBF4
HZ5	PLA2G7
HZ5	ADORA2B
HZ5	GUSB
HZ5	AURKB
HZ5	PLK1
HZ5	DYRK1A
HZ5	DYRK1B
HZ5	CA14
HZ5	HSP90AA1
HZ5	HSP90AB1
HZ5	MAOB
HZ5	EGFR
HZ5	ADAMTS5
HZ5	KCNMA1
HZ5	FLT1
HZ5	RET
HZ5	FGFR1
HZ5	CDK5
HZ5	CDC7
HZ6	SLC6A4
HZ6	SLC6A3
HZ6	SLC6A2
HZ6	SCN5A
HZ6	RXRA
HZ6	PTGS2
HZ6	PTGS1
HZ6	PRSS1
HZ6	PIM1
HZ6	PDE3A
HZ6	OPRM1
HZ6	OPRD1
HZ6	NOS3
HZ6	NOS2
HZ6	GSK3B
HZ6	GRIA2
HZ6	GABRA1
HZ6	ESR2
HZ6	ESR1
HZ6	DRD1
HZ6	CHRNA7
HZ6	CHRNA2
HZ6	CHRM3
HZ6	CHRM2
HZ6	CHRM1
HZ6	CCNA2
HZ6	CA2
HZ6	AR
HZ6	ADRB2
HZ6	ADRA2B
HZ6	ADRA1B
HZ6	ADRA1A
HZ6	ACHE
HZ6	BCHE
HZ6	ACHE
HZ6	CLK4
HZ6	PDGFRB
HZ6	EGFR
HZ6	KDR
HZ6	GSK3B
HZ6	CDK8
HZ6	MAPK14
HZ6	PGR
HZ6	CA2
HZ6	SLC6A2
HZ6	CA7
HZ6	CA6
HZ6	CA12
HZ6	CA14
HZ6	CA9
HZ6	CA4
HZ6	CA13
HZ6	CA5B
HZ6	PDE10A
HZ6	CA5A
HZ6	MT-CO2
HZ6	BDKRB2
HZ6	BRS3
HZ6	NR4A1
HZ6	CSNK1D
HZ6	JAK1
HZ6	GRM5
HZ6	NQO2
HZ6	AURKB
HZ6	MAPKAPK2
HZ6	CSNK1G1
HZ6	FGFR1
HZ6	TGFBR1
HZ6	PIM1
HZ6	PTPN1
HZ6	PIM3
HZ6	ERBB2
HZ6	BRD4
HZ6	BRD2
HZ6	BRD3
HZ6	SLC27A1
HZ6	KCNA5
HZ6	HDAC2
HZ6	HDAC1
HZ6	PGGT1B
HZ6	PTGER4
HZ6	PTGER2
HZ6	CCNE2
HZ6	ADORA2B
HZ6	FNTA
HZ6	NPY5R
HZ6	IGF1R
HZ6	NR3C2
HZ6	PLA2G7
HZ6	KCNA3
HZ6	JAK2
HZ6	HDAC3
HZ6	DRD4
HZ6	PIP4K2C
HZ6	FLT3
HZ6	CDK2
HZ6	TYK2
HZ6	EPHX1
HZ6	HCRTR2
HZ6	P2RX7
HZ6	LRRK2
HZ6	AR
HZ6	NR3C1
HZ6	ESR1
HZ6	ADORA1
HZ6	ADRA1A
HZ6	ADORA2A
HZ6	CTSS
HZ6	MCHR1
HZ6	MAP3K8
HZ6	CA1
HZ6	PTAFR
HZ6	F2RL3
HZ6	GPBAR1
HZ6	DRD2
HZ6	MAPK8
HZ6	C5AR1
HZ6	GRM1
HZ6	DRD3
HZ6	CDK2
HZ6	JAK3
HZ6	PTGS1
HZ6	LCK
HZ6	TNK2
HZ6	SLC1A3
HZ6	GABRA5
HZ6	CASP3
HZ6	CASP7
HZ6	HCRTR1
HZ6	ADRA2A
HZ6	ADRA2C
HZ6	ADRA2B
HZ6	PSEN2
HZ6	CDK2
HZ6	CCNE1
HZ6	PSENEN
HZ6	NCSTN
HZ6	APH1A
HZ6	PSEN1
HZ6	APH1B
HZ6	CCNA1
HZ6	CCNA2
HZ6	FNTB
HZ7	SCN5A
HZ7	OPRM1
HZ7	OPRD1
HZ7	AR
B	XDH
B	VEGFA
B	VCAM1
B	TP53
B	TOP2A
B	TOP2
B	TOP1
B	TNF
B	THBD
B	TGFB1
B	STAT1
B	SPP1
B	SOD1
B	SLC2A4
B	SERPINE1
B	SELE
B	SCN5A
B	RXRA
B	RUNX2
B	RUNX1T1
B	RELA
B	RB1
B	RASSF1
B	RASA1
B	RAF1
B	PTGS2
B	PTGS1
B	PTGER3
B	PTEN
B	PSMD3
B	PRSS1
B	PRKCB
B	PRKCA
B	PPARG
B	PPARG
B	PPARD
B	PPARA
B	POR
B	PON1
B	PLAU
B	PLAT
B	PIK3CG
B	PCOLCE
B	PARP1
B	ODC1
B	NR1I3
B	NR1I2
B	NQO1
B	NPEPPS
B	NOS3
B	NOS3
B	NKX3-1
B	NFKBIA
B	NFE2L2
B	NCOA2
B	NCF1
B	MYC
B	MPO
B	MMP9
B	MMP3
B	MMP2
B	MMP1
B	MGAM
B	MAPK1
B	MAOB
B	KCNH2
B	JUN
B	IRF1
B	INSR
B	IL6
B	IL2
B	IL1B
B	IL1A
B	IL10
B	IGFBP3
B	IGF2
B	IFNG
B	ICAM1
B	HSPB1
B	HSF1
B	HMOX1
B	HK2
B	HIF1A
B	HAS2
B	GSTP1
B	GSTM2
B	GSTM1
B	GJA1
B	GABRA1
B	FOS
B	F7
B	F3
B	F10
B	ERBB3
B	ERBB2
B	ELK1
B	EIF6
B	EGFR
B	EGF
B	E2F2
B	E2F1
B	DUOX2
B	DPP4
B	DIO1
B	DCAF5
B	CYP3A4
B	CYP1B1
B	CYP1A2
B	CYP1A1
B	CXCL8
B	CXCL2
B	CXCL11
B	CXCL10
B	CTSD
B	CRP
B	COL3A1
B	COL1A1
B	CLDN4
B	CHUK
B	CHEK2
B	CDKN1A
B	CD40LG
B	CCND1
B	CCNB1
B	CCL2
B	CAV1
B	CASP9
B	CASP8
B	CASP3
B	BIRC5
B	BCL2L1
B	BCL2
B	BAX
B	AR
B	ALOX5
B	AKT1
B	AHSA1
B	AHR
B	ADRB2
B	ACP3
B	ACHE
B	ACACA
B	NOX4
B	AKR1B1
B	CDK5R1
B	XDH
B	MAOA
B	FLT3
B	CA2
B	CCNB3
B	ALOX5
B	ADORA1
B	CA7
B	GLO1
B	APP
B	SYK
B	GSK3B
B	PARP1
B	TTR
B	MMP9
B	CA12
B	MMP2
B	CA4
B	MMP12
B	CD38
B	CYP1B1
B	ABCG2
B	AKR1B10
B	TNKS2
B	TNKS
B	TOP1
B	ARG1
B	PTPRS
B	ABCC1
B	HSD17B1
B	ACHE
B	CDK6
B	ABCB1
B	HSD17B2
B	ALOX15
B	ALOX12
B	ESR2
B	CYP19A1
B	ADORA2A
B	CSNK2A1
B	ESR1
B	PTGS2
B	CFTR
B	AMY1A
B	GRK6
B	CDK2
B	TERT
B	CA1
B	CA9
B	CDK1
B	TYR
B	AHR
B	ESRRA
B	GPR35
B	DAPK1
B	AVPR2
B	IGF1R
B	EGFR
B	F2
B	PIM1
B	AURKB
B	DRD4
B	MPO
B	PIK3R1
B	PYGL
B	SRC
B	PTK2
B	KDR
B	MMP13
B	MMP3
B	CA3
B	PLK1
B	CA6
B	PKN1
B	CA14
B	MET
B	NEK2
B	CXCR1
B	CAMK2B
B	ALK
B	AKT1
B	NEK6
B	PLA2G1B
B	CA5A
B	BACE1
B	AXL
B	NUAK1
B	AKR1C2
B	AKR1C1
B	AKR1C3
B	AKR1C4
B	CA13
B	AKR1A1
B	PFKFB3
B	KDM4E
B	PLG
B	AR
B	CDK5
B	CDK1
B	CCNB1
B	CCNB2
B	TYMS
B	DHFR
B	SLC19A1
B	SLC46A1
B	FOLR1
B	HDAC8
B	FPGS
B	FOLR2
B	HDAC6
B	HDAC1
B	GART
B	ATIC
B	NOS2
B	SLC5A1
C	TGFB1
C	SLC6A4
C	SCN5A
C	PTGS2
C	PTGS1
C	PRKCA
C	PON1
C	PIK3CG
C	PGR
C	PDE3A
C	OPRM1
C	NCOA2
C	MAP2
C	KCNH2
C	JUN
C	HTR2A
C	GABRA5
C	GABRA3
C	GABRA2
C	GABRA1
C	DRD1
C	CHRNA7
C	CHRNA2
C	CHRM4
C	CHRM3
C	CHRM2
C	CHRM1
C	CASP9
C	CASP8
C	CASP3
C	BCL2
C	BAX
C	ADRB2
C	ADRA1B
C	ADRA1A
C	AR
C	HMGCR
C	CYP51A1
C	NPC1L1
C	NR1H3
C	CYP19A1
C	CYP17A1
C	RORC
C	ESR1
C	ESR2
C	SREBF2
C	SHBG
C	SLC6A2
C	CYP2C19
C	RORA
C	PTPN1
C	BCHE
C	SERPINA6
C	SLC6A4
C	CHRM2
C	VDR
C	ACHE
C	G6PD
C	NR1H2
C	GLRA1
C	CES2
C	PTGER1
C	PTGER2
C	HSD11B1
C	PTGES
C	CDC25A
C	PPARA
C	PPARD
C	DHCR7
C	SQLE
C	PTPN6
C	NR1I3
C	FDFT1
C	SIGMAR1
C	NOS2
C	NR3C1
C	PPARG
C	CDC25B
C	UGT2B7
C	HSD11B2
C	POLB
E	XDH
E	VEGFA
E	TYR
E	TP53
E	TOP2A
E	TOP1
E	TNF
E	SLC2A4
E	RELA
E	RB1
E	PTGS2
E	PTGS1
E	PTGES
E	PRSS1
E	PPARG
E	PIK3CG
E	PCNA
E	NUF2
E	NFKBIA
E	NCOA2
E	MMP9
E	MMP2
E	MMP1
E	MET
E	MDM2
E	MCL1
E	MAPK1
E	JUN
E	INSR
E	IL6
E	IL4
E	IL2
E	IL10
E	IFNG
E	ICAM1
E	HMOX1
E	GSTP1
E	ERBB2
E	EGFR
E	DPP4
E	CDKN1A
E	CD40LG
E	CCND1
E	CCNB1
E	CASP9
E	CASP7
E	CASP3
E	BIRC5
E	BCL2L1
E	AR
E	APP
E	AKT1
E	ADCY2
E	NOX4
E	AVPR2
E	AKR1B1
E	XDH
E	MAOA
E	IGF1R
E	FLT3
E	CYP19A1
E	EGFR
E	F2
E	CA2
E	PIM1
E	ALOX5
E	AURKB
E	DRD4
E	ADORA1
E	CA7
E	GLO1
E	MPO
E	PIK3R1
E	ADORA2A
E	DAPK1
E	PYGL
E	CA1
E	GSK3B
E	SRC
E	PTK2
E	HSD17B2
E	KDR
E	MMP13
E	MMP3
E	CA3
E	ALOX15
E	ABCC1
E	PLK1
E	CA6
E	CDK1
E	MMP9
E	CA12
E	MMP2
E	PKN1
E	CA14
E	CA9
E	CSNK2A1
E	ALOX12
E	MET
E	CA4
E	NEK2
E	CXCR1
E	CAMK2B
E	ALK
E	AKT1
E	ABCB1
E	NEK6
E	PLA2G1B
E	CA5A
E	BACE1
E	CYP1B1
E	AXL
E	ABCG2
E	NUAK1
E	AKR1C2
E	AKR1C1
E	AKR1C3
E	AKR1C4
E	CA13
E	AKR1A1
E	GPR35
E	SYK
E	MAPT
E	KDM4E
E	TOP2A
E	INSR
E	ACHE
E	MYLK
E	PIK3CG
E	APEX1
E	CDK5R1
E	CCNB3
E	ARG1
E	PTPRS
E	ESR2
E	MPG
E	SLC22A12
E	CDK6
E	CDK2
E	TYR
E	HSD17B1
E	AHR
E	ESRRA
E	APP
E	PARP1
E	TTR
E	MMP12
E	CD38
E	AKR1B10
E	TNKS2
E	TNKS
E	TOP1
E	TERT
E	CDK5
E	CDK1
E	CCNB1
E	CCNB2

## Sheet: Hedyotis diffusa
Supplementary Table 2e
Active ingredient	Target
BH1	PGR
BH1	NR3C2
BH1	AR
BH1	NPC1L1
BH1	HMGCR
BH1	CYP51A1
BH1	CYP19A1
BH1	NR1H3
BH1	CYP17A1
BH1	RORC
BH1	ESR1
BH1	ESR2
BH1	SHBG
BH1	SREBF2
BH1	ACHE
BH1	CYP2C19
BH1	PTPN1
BH1	SLC6A2
BH1	BCHE
BH1	RORA
BH1	SERPINA6
BH1	SLC6A4
BH1	CHRM2
BH1	G6PD
BH1	VDR
BH1	NR1H2
BH1	HSD11B1
BH1	PTGER1
BH1	PTGER2
BH1	CDC25A
BH1	GLRA1
BH1	CES2
BH1	PTGES
BH1	PPARA
BH1	PPARD
BH1	SQLE
BH1	DHCR7
BH1	NR1I3
BH1	PTPN6
BH1	NR3C1
BH1	CDC25B
BH1	NOS2
BH1	HSD11B2
BH1	TBXAS1
BH1	PPARG
BH1	UGT2B7
BH1	POLB
BH2	PTPN1
BH2	POLB
BH2	AKR1B10
BH2	RORC
BH2	PTPRF
BH2	PTPN2
BH2	HSD11B1
BH2	ACP1
BH2	CDC25B
BH2	PDE4D
BH2	CD81
BH2	PLA2G1B
BH2	PTGES
BH2	CDC25A
BH2	NOS2
BH2	TERT
BH2	CES2
BH2	FABP1
BH2	PREP
BH2	PTPN6
BH2	PTGS2
BH2	SCD
BH2	FABP4
BH2	PPARG
BH2	PPARA
BH2	FNTA
BH2	CYP19A1
BH2	FAAH
BH2	PTPN11
BH2	NR3C1
BH2	PPARD
BH2	LTB4R
BH2	SERPINA6
BH2	SHBG
BH2	G6PD
BH2	CYP51A1
BH2	ESR2
BH2	PGR
BH2	HSD11B2
BH2	PTGS1
BH2	AR
BH2	NPC1L1
BH2	SIGMAR1
BH2	CYP17A1
BH2	FABP3
BH2	FABP5
BH2	PTGER2
BH2	NR1H3
BH2	PTGER4
BH2	SAE1
BH2	BACE1
BH2	CYP2C19
BH2	HMGCR
BH2	TOP1
BH2	ALOX5
BH2	PRKCH
BH2	CNR1
BH2	PTGER1
BH2	CHRM2
BH2	NR3C2
BH2	GRIK1
BH2	GRIK2
BH2	TOP2A
BH2	CYSLTR1
BH2	MDM2
BH2	MAPK3
BH2	AGTR1
BH2	PTGIR
BH2	FFAR1
BH2	RORA
BH2	S1PR2
BH2	HSF1
BH2	NR1H4
BH2	NR1I3
BH2	ESR1
BH2	SLC6A3
BH2	ADORA3
BH2	CES1
BH2	CCR1
BH2	OGFRL1
BH2	FNTB
BH2	UBA2
BH3	SLC6A4
BH3	SLC6A3
BH3	SLC6A2
BH3	SCN5A
BH3	RXRA
BH3	PTGS2
BH3	PTGS1
BH3	PKIA
BH3	PIK3CG
BH3	PDE3A
BH3	OPRM1
BH3	OPRD1
BH3	NCOA2
BH3	HTR2C
BH3	HTR2A
BH3	HRH1
BH3	GABRA1
BH3	ESR1
BH3	DRD1
BH3	CHRNA7
BH3	CHRM5
BH3	CHRM4
BH3	CHRM3
BH3	CHRM2
BH3	CHRM1
BH3	ADRB2
BH3	ADRA1D
BH3	ADRA1B
BH3	ADRA1A
BH3	ELANE
BH3	LCK
BH3	ESR2
BH3	LIMK1
BH3	PTP4A3
BH3	PIM1
BH3	DUSP3
BH3	CSNK2A1
BH3	EGFR
BH3	ESR1
BH3	CYP11B1
BH3	CYP11B2
BH3	CYP17A1
BH3	FNTA
BH3	HTR2B
BH3	HSD11B1
BH3	MCL1
BH3	P2RX7
BH3	ATM
BH3	PTGER4
BH3	PTGER2
BH3	PREP
BH3	FAP
BH3	GRM4
BH3	HCRTR2
BH3	HCRTR1
BH3	CCNE2
BH3	STAT3
BH3	ACHE
BH3	CCR5
BH3	HTR1A
BH3	CCNB3
BH3	FGFR1
BH3	CACNA1B
BH3	CYP19A1
BH3	CTSS
BH3	SOAT1
BH3	GRM5
BH3	CTSV
BH3	CHEK1
BH3	PDGFRA
BH3	FTO
BH3	TLR9
BH3	KAT2B
BH3	GAPDH
BH3	ADORA2A
BH3	CSF1R
BH3	PSEN2
BH3	CCND3
BH3	CCNC
BH3	ICAM1
BH3	VCAM1
BH3	SELE
BH3	CXCR3
BH3	GABRA1
BH3	GABRA5
BH3	PTK2B
BH3	BCL2
BH3	LRRK2
BH3	PDE5A
BH3	PDE4B
BH3	HSP90AA1
BH3	CMA1
BH3	CTSB
BH3	SIRT2
BH3	FLT3
BH3	TNFRSF1A
BH3	MAP2K1
BH3	GSTP1
BH3	CXCR1
BH3	HDAC6
BH3	CHRM1
BH3	ADRA1A
BH3	ADRA1B
BH3	SRC
BH3	PDE10A
BH3	TRPA1
BH3	PGGT1B
BH3	PRKDC
BH3	CAPN1
BH3	KCNA5
BH3	NAAA
BH3	CHRM2
BH3	TDO2
BH3	FAAH
BH3	SIGMAR1
BH3	PDE9A
BH3	SCD
BH3	CYP1A1
BH3	MAPK8
BH3	CYP1A2
BH3	TGFBR1
BH3	CYP1B1
BH3	CDK7
BH3	TNKS
BH3	MAOA
BH3	HTR2A
BH3	PDE2A
BH3	HRH4
BH3	MGLL
BH3	CDK2
BH3	CCNE1
BH3	FNTA
BH3	CCNH
BH3	PSENEN
BH3	NCSTN
BH3	APH1A
BH3	PSEN1
BH3	APH1B
BH3	CCND1
BH3	CDK4
BH3	CCND2
BH3	PDGFRB
BH3	CDK8
BH3	CDK1
BH3	CCNB1
BH3	CCNB2
BH3	FNTB
B	XDH
B	VEGFA
B	VCAM1
B	TP53
B	TOP2A
B	TOP2
B	TOP1
B	TNF
B	THBD
B	TGFB1
B	STAT1
B	SPP1
B	SOD1
B	SLC2A4
B	SERPINE1
B	SELE
B	SCN5A
B	RXRA
B	RUNX2
B	RUNX1T1
B	RELA
B	RB1
B	RASSF1
B	RASA1
B	RAF1
B	PTGS2
B	PTGS1
B	PTGER3
B	PTEN
B	PSMD3
B	PRSS1
B	PRKCB
B	PRKCA
B	PPARG
B	PPARG
B	PPARD
B	PPARA
B	POR
B	PON1
B	PLAU
B	PLAT
B	PIK3CG
B	PCOLCE
B	PARP1
B	ODC1
B	NR1I3
B	NR1I2
B	NQO1
B	NPEPPS
B	NOS3
B	NOS3
B	NKX3-1
B	NFKBIA
B	NFE2L2
B	NCOA2
B	NCF1
B	MYC
B	MPO
B	MMP9
B	MMP3
B	MMP2
B	MMP1
B	MGAM
B	MAPK1
B	MAOB
B	KCNH2
B	JUN
B	IRF1
B	INSR
B	IL6
B	IL2
B	IL1B
B	IL1A
B	IL10
B	IGFBP3
B	IGF2
B	IFNG
B	ICAM1
B	HSPB1
B	HSF1
B	HMOX1
B	HK2
B	HIF1A
B	HAS2
B	GSTP1
B	GSTM2
B	GSTM1
B	GJA1
B	GABRA1
B	FOS
B	F7
B	F3
B	F10
B	ERBB3
B	ERBB2
B	ELK1
B	EIF6
B	EGFR
B	EGF
B	E2F2
B	E2F1
B	DUOX2
B	DPP4
B	DIO1
B	DCAF5
B	CYP3A4
B	CYP1B1
B	CYP1A2
B	CYP1A1
B	CXCL8
B	CXCL2
B	CXCL11
B	CXCL10
B	CTSD
B	CRP
B	COL3A1
B	COL1A1
B	CLDN4
B	CHUK
B	CHEK2
B	CDKN1A
B	CD40LG
B	CCND1
B	CCNB1
B	CCL2
B	CAV1
B	CASP9
B	CASP8
B	CASP3
B	BIRC5
B	BCL2L1
B	BCL2
B	BAX
B	AR
B	ALOX5
B	AKT1
B	AHSA1
B	AHR
B	ADRB2
B	ACP3
B	ACHE
B	ACACA
B	NOX4
B	AKR1B1
B	CDK5R1
B	XDH
B	MAOA
B	FLT3
B	CA2
B	CCNB3
B	ALOX5
B	ADORA1
B	CA7
B	GLO1
B	APP
B	SYK
B	GSK3B
B	PARP1
B	TTR
B	MMP9
B	CA12
B	MMP2
B	CA4
B	MMP12
B	CD38
B	CYP1B1
B	ABCG2
B	AKR1B10
B	TNKS2
B	TNKS
B	TOP1
B	ARG1
B	PTPRS
B	ABCC1
B	HSD17B1
B	ACHE
B	CDK6
B	ABCB1
B	HSD17B2
B	ALOX15
B	ALOX12
B	ESR2
B	CYP19A1
B	ADORA2A
B	CSNK2A1
B	ESR1
B	PTGS2
B	CFTR
B	AMY1A
B	GRK6
B	CDK2
B	TERT
B	CA1
B	CA9
B	CDK1
B	TYR
B	AHR
B	ESRRA
B	GPR35
B	DAPK1
B	AVPR2
B	IGF1R
B	EGFR
B	F2
B	PIM1
B	AURKB
B	DRD4
B	MPO
B	PIK3R1
B	PYGL
B	SRC
B	PTK2
B	KDR
B	MMP13
B	MMP3
B	CA3
B	PLK1
B	CA6
B	PKN1
B	CA14
B	MET
B	NEK2
B	CXCR1
B	CAMK2B
B	ALK
B	AKT1
B	NEK6
B	PLA2G1B
B	CA5A
B	BACE1
B	AXL
B	NUAK1
B	AKR1C2
B	AKR1C1
B	AKR1C3
B	AKR1C4
B	CA13
B	AKR1A1
B	PFKFB3
B	KDM4E
B	PLG
B	AR
B	CDK5
B	CDK1
B	CCNB1
B	CCNB2
B	TYMS
B	DHFR
B	SLC19A1
B	SLC46A1
B	FOLR1
B	HDAC8
B	FPGS
B	FOLR2
B	HDAC6
B	HDAC1
B	GART
B	ATIC
B	NOS2
B	SLC5A1
C	TGFB1
C	SLC6A4
C	SCN5A
C	PTGS2
C	PTGS1
C	PRKCA
C	PON1
C	PIK3CG
C	PGR
C	PDE3A
C	OPRM1
C	NCOA2
C	MAP2
C	KCNH2
C	JUN
C	HTR2A
C	GABRA5
C	GABRA3
C	GABRA2
C	GABRA1
C	DRD1
C	CHRNA7
C	CHRNA2
C	CHRM4
C	CHRM3
C	CHRM2
C	CHRM1
C	CASP9
C	CASP8
C	CASP3
C	BCL2
C	BAX
C	ADRB2
C	ADRA1B
C	ADRA1A
C	AR
C	HMGCR
C	CYP51A1
C	NPC1L1
C	NR1H3
C	CYP19A1
C	CYP17A1
C	RORC
C	ESR1
C	ESR2
C	SREBF2
C	SHBG
C	SLC6A2
C	CYP2C19
C	RORA
C	PTPN1
C	BCHE
C	SERPINA6
C	SLC6A4
C	CHRM2
C	VDR
C	ACHE
C	G6PD
C	NR1H2
C	GLRA1
C	CES2
C	PTGER1
C	PTGER2
C	HSD11B1
C	PTGES
C	CDC25A
C	PPARA
C	PPARD
C	DHCR7
C	SQLE
C	PTPN6
C	NR1I3
C	FDFT1
C	SIGMAR1
C	NOS2
C	NR3C1
C	PPARG
C	CDC25B
C	UGT2B7
C	HSD11B2
C	POLB
D	SLC6A3
D	SLC6A2
D	SCN5A
D	RXRA
D	PTGS2
D	PTGS1
D	PLAU
D	PGR
D	NR3C2
D	NCOA2
D	NCOA1
D	MAOB
D	MAOA
D	LTA4H
D	HTR2A
D	GABRA3
D	GABRA1
D	CTRB1
D	CHRNA7
D	CHRM3
D	CHRM2
D	CHRM1
D	ADRB2
D	ADRB1
D	ADRA2A
D	ADRA1B
D	ADRA1A
D	ADH1C
D	AR
D	NPC1L1
D	HMGCR
D	CYP51A1
D	CYP19A1
D	NR1H3
D	CYP17A1
D	RORC
D	ESR1
D	ESR2
D	SHBG
D	SREBF2
D	ACHE
D	CYP2C19
D	PTPN1
D	SLC6A2
D	BCHE
D	RORA
D	SERPINA6
D	SLC6A4
D	CHRM2
D	G6PD
D	VDR
D	NR1H2
D	HSD11B1
D	PTGER1
D	PTGER2
D	CDC25A
D	GLRA1
D	CES2
D	PTGES
D	PPARA
D	PPARD
D	SQLE
D	DHCR7
D	NR1I3
D	PTPN6
D	NR3C1
D	CDC25B
D	NOS2
D	HSD11B2
D	TBXAS1
D	PPARG
D	UGT2B7
D	POLB

## Sheet: Polygala tenuifolia
Supplementary Table 2f
Active ingredient	Target
YZ1	AR
YZ1	SRD5A1
YZ1	CYP17A1
YZ1	SLC8A1
YZ1	F12
YZ1	ESR1
YZ1	TRPV1
YZ1	PPARG
YZ1	PTGER1
YZ1	FFAR1
YZ1	PTGER4
YZ1	PGR
YZ1	NR3C1
YZ1	OPRK1
YZ1	FADS2
YZ1	FADS1
YZ1	PPARD
YZ1	PTGER2
YZ1	PTGS1
YZ1	ACSL4
YZ1	PTGER3
YZ1	PTGS2
YZ1	ELOVL4
YZ1	ANXA1
YZ1	ACSL3
YZ1	NR3C2
YZ2	CHRM3
YZ2	CHRM1
YZ2	CHRM5
YZ2	CHRNA2
YZ2	SI
YZ2	HTR3A
YZ2	CHRM2
YZ2	CHRM4
YZ3	AR
YZ4	CHRM3
YZ4	CHRM1
YZ4	ACE
YZ4	CHRNA2
YZ4	HTR3A
YZ4	CHRM2
YZ5	CHRM3
YZ5	CHRNA2
YZ5	CHRM2
YZ5	CHRM1
YZ5	ACE
YZ5	HTR3A

## Sheet: Dendrobium nobile
Supplementary Table 2g
Active ingredient	Target
SH1	BHMT2
SH1	MTRR
SH1	METAP2
SH1	MTR
SH1	BHMT
SH1	GSTP1
SH1	TRAF2
SH1	CBS
SH1	COMT
SH1	CSAD
SH1	CDO1
SH1	NFS1
SH1	GCLC
SH1	GSS
SH1	GOT1
SH1	CARS
SH1	CBSL
SH1	GCLM
SH1	CARS2
SH1	CTH
SH1	SLC19A3
SH1	MGMT
SH1	SLC1A5
SH1	GOT2
SH1	GPT2
SH1	BAAT
SH1	OAZ3
SH1	SHMT1
SH1	ABAT
SH1	SLC1A1
SH1	SLC7A2
SH1	GCSH
SH1	SLC7A8
SH1	PPAT
SH1	ACY3
SH1	ASPA
SH1	IARS2
SH1	GLRA2
SH1	ALAS1
SH1	BCAT1
SH1	GCAT
SH1	SLC38A3
SH1	VARS
SH1	SLC25A15
SH1	SLC1A4
SH1	ADSSL1
SH1	VDAC3
SH1	ASNS
SH1	GLRA3
SH1	DARS2
SH1	GRIN3B
SH1	LCMT1
SH1	GRIN2A
SH1	GNMT
SH1	GLRB
SH1	GLYAT
SH1	AARS2
SH1	ASPH
SH1	GPR18
SH1	CTPS1
SH1	SLC25A12
SH1	PHYKPL
SH1	GLYATL1
SH1	GATM
SH1	LARS
SH1	ARG1
SH1	NARS2
SH1	TNNC1
SH1	DARS
SH1	GRIN2C
SH1	OAT
SH1	GLDC
SH1	VDAC2
SH1	OAZ2
SH1	PIPOX
SH1	ACADL
SH1	CAV1
SH1	ALLC
SH1	AHCYL1
SH1	C1QTNF3
SH1	CPQ
SH1	MRI1
SH1	MAD2L2
SH1	NDOR1
SH1	NR4A3
SH1	POR
SH1	NOS2
SH1	AHCYL2
SH1	VIMP
SH1	APOD
SH1	PGGT1B
SH1	EDN1
SH1	ADNP
SH1	UNCX
SH1	MAPK8IP3
SH1	NARS
SH1	SPAG9
SH1	APIP
SH1	SAMD9L
SH1	DMGDH
SH1	DPEP1
SH1	GLRA1
SH1	LYZ
SH1	LCMT2
SH1	PAICS
SH1	IARS
SH1	BCAT2
SH1	ACY1
SH1	KYNU
SH1	SLC25A13
SH1	PCCB
SH1	OTC
SH1	GLUL
SH1	AGXT2
SH1	ARG2
SH1	SLC36A1
SH1	ACADSB
SH1	SLC6A5
SH1	SLC7A4
SH1	CAD
SH1	LARS2
SH1	RNASE1
SH1	ASS1
SH1	ADSS
SH1	SLC7A1
SH1	GLYATL2
SH1	SLC32A1
SH1	OAZ1
SH1	KARS
SH1	AGXT
SH1	ALAS2
SH1	VDAC1
SH1	SLC6A9
SH1	SLC7A3
SH1	ASRGL1
SH1	SLC25A2
SH1	GARS
SH1	GPT
SH1	AARS
SH1	SHMT2
SH2	NR3C1
SH2	NR3C2
SH2	PGR
SH2	AR
SH2	CYP19A1
SH2	WNT4
SH3	GABRB2
SH3	GABRB3
SH3	F2
SH3	GPR27
SH3	CD36
SH3	SDC4
SH3	CD47
SH3	BICD1
SH4	SLC19A2
SH4	TPK1
SH5	PDE10A
SH5	PDE4B
SH5	PDE4D
SH5	PDE5A
SH5	PDE9A
SH5	PDE1B
SH5	PLN
SH5	HRC
SH5	CAMK2D
SH5	PDE2A
SH5	CAMK2G
SH5	PDE11A
SH6	GABRB2
SH6	GABRB3
SH6	F2
SH6	GPR27
SH6	CD36
SH6	SDC4
SH6	CD47
SH6	BICD1
